**Index of Issues:** January, pp. 1–112; February, pp. 113–208; March, pp. 209–304; April, pp. 305–398; May, pp. 399–492; June, pp. 493–624.

## SUBJECT INDEX TO VOLUME 58

Subject entries for all material in the JOURNAL appear in this index. Entries from the JOURNAL departments are identified by the departments in which the subject matter appears, *e.g.*, Clinical Reports.

### A

**Abortion, see under Pregnancy; Surgery**

**Accessory nerve, see under Nerve**

**Acetylcholine, see under Brain**

**Acquired immunodeficiency syndrome (AIDS), see under Immune response**

**Adapters, see under Equipment**

**Adenosine triphosphate, see under Metabolism**

**Aerosols**

local anesthetics, compared [Downes, Hirshman, & Leon], 216

**Age factors**

and baroresponse and cardiovascular depression by halothane (correspondence) [Friesen], 387

and baroresponse and cardiovascular depression by halothane (correspondence) [Ware, Robinson, & Gregory], 387

**child abuse**

delayed awakening from anesthesia and (clinical report) [Ott, Pollack, Riddick, Reisch, & Epstein], 178

in perianesthetic management (editorial view) [Betts & Nicholson], 115

in nitrous oxide requirement of mice [Koblin, Lurz, & Eger], 428

**AIDS, see under Immune response**

**Air embolism, see under Complications; Embolism**

**Airway**

*see also* Equipment

**anatomy**

deviation of, with cervical spine disease in erosive polyarticular arthritis [Keenan, Stiles, & Kaufman], 441

in DiGeorge syndrome, anesthesia for surgery and (clinical report) [Flashburg], 479

juvenile, in adult with suprasellar tumor (clinical report) [Veselis & Korbon], 481

management, for ophthalmic and head and neck surgery (correspondence) [Bedger, Chang, Larson, & Bleyaert], 199

obstruction, in Hallervorden-Spatz disease, anesthetic management in (clinical report) [Roy, McLain, Wise, & Shaffner], 382

oral, removal of, detachment of esophageal stethoscope cuff during (correspondence) [Gandhi & Dhamee], 202

preparation of, for nasotracheal intubation (correspondence) [Berger & Stirt], 105

reactivity in humans (medical intelligence) [Hirshman], 170

resistance, in adult with suprasellar tumor (clinical report) [Veselis & Korbon], 481

subglottic stenosis, anesthetic management and gas scavenging for laser surgery in (clinical report) [Rita, Seleny, & Holinger], 191

**Alarms, see under Equipment**

**Alcohol**

metabolism by rat hepatic microsomes of fluorinated ether anesthetics following consumption of [Rice, Dooley, & Mazze], 237

**Aldosterone, see under Hormones**

**$\gamma$ -Aminobutyric acid, see under Brain**

**Aminophylline, see under Sympathetic nervous system**

**Ammonia intoxication, see under Complications**

**Analgesia**

postoperative, epidural morphine in, for postcesarean patient [Cohen & Woods], 500

suppression of noxiously evoked WDR dorsal horn neuronal activity by [Homma, Collins, Kitahata, Matsumoto, & Kawahara], 232

and suppression of WDR neurons, by spinal fentanyl [Suzukawa, Matsumoto, Collins, Kitahata, & Yuge], 510

**Analgesics**

**narcotic**

codeine, and zomepirac, compared as analgesic premedicants in short-stay surgery (clinical report) [Dunn, Morison, Fargas-Babjak, & Goldsmith], 265

fentanyl, postoperative rigidity following (clinical report) [Christian, Waller, & Moldenhauer], 275

**morphine**

biphasic depression of ventilatory responses to CO<sub>2</sub> following [Kafer, Brown, Scott, Findlay, Butz, Teeple, & Ghia], 418

epidural, influence of epinephrine as adjuvant to [Bromage, Camporesi, Durant, & Nielsen], 257

epidural, Japanese pioneer in clinical use of (correspondence) [Matsuki], 289

epidural, for postcesarean patient [Cohen & Woods], 500

pharmacokinetics aspects of [Nordberg, Hedner, Mellstrand, & Dahlstrom], 545

nalbuphine, and droperidol, for local standby sedation (correspondence) [Klein], 397

nitrous oxide, and naloxone and its analeptic effect (correspondence) [Gillman & Lichtigfeld], 287

**Analyzers, oxygen, see under Equipment**

**Anatomy**

airway, deviation of, with cervical spine disease in erosive polyarticular arthritis [Keenan, Stiles, & Kaufman], 441

**Anesthesia**

balanced, atracurium in surgical patients receiving [Sokoll, Gergis, Mehta, Ali, & Lineberry], 450

cardiac, in Kawasaki disease (clinical report) [McNiece & Krishna], 269

**cardiovascular**

fentanyl-induced truncal rigidity during (clinical report) [Jaffe & Ramsey], 562

pancuronium in, effects of cardiopulmonary bypass and hypothermia on [d'Hollander, Duvaldestin, Henzel, Nevelsteen, & Bomblet], 505

in Wolff-Parkinson-White syndrome [Gómez-Arnau, Márquez-Montes, & Avello], 307

complications, and prospective evaluation of cardiac risk index (clinical report) [Jeffrey, Kunsman, Cullen, & Brewster], 462

management, "ATTENDING" computer system in (special article) [Miller], 362

and neuroradiology, metrizamide in (correspondence) [Pyles & Pashayan], 590

**neurosurgical**

craniotomy, nitrous oxide and prevention of tension pneumocephalus after (correspondence) [Friedman], 196

high-dose fentanyl for (clinical report) [Shupak, Harp, Stevenson-Smith, Rossi, & Buchheit], 579

hypothermia in pregnancy (clinical report) [Stänge & Halldin], 460

and nitrous oxide and intraoperative tension pneumocephalus (correspondence) [Frost], 197

and sights and sounds of air (editorial view) [Albin], 113

tension pneumocephalus and (correspondence) [Marschall], 301

transesophageal Doppler for detection of air embolism during [Martin & Colley], 117

transesophageal echocardiography for detection of air embolism during [Furuya, Suzuki, Okumura, Kishi, & Uefuji], 124

**obstetric****cesarean section**

epidural morphine following [Cohen & Woods], 500

reduced volume dose of sodium citrate prior to (correspondence) [Stoops, Ravindran, & Viegas], 201

type and screen for (clinical report) [Reisner], 476

citrate antacids prior to, buffering capacity of (correspondence) [Conklin & Ziadlou-Rad], 391

in early pregnancy, spread of epidural analgesia in (clinical report) [Fagraeus, Urban, & Bromage], 184

epidural catheters in, technique is critical variable in (correspondence) [Larson], 587

epidural catheters in, technique is critical variable in (correspondence) [Naulty], 588

epidural test dose in (correspondence) [Stonham & Moss], 389

etidocaine in, and toxicity in adult, newborn, and fetal sheep [Morishima, Pedersen, Finster, Feldman, & Covino], 342

hypothermia in pregnancy (clinical report) [Stänge & Halldin], 460

pre-induction, particulate antacids and (correspondence) [Eylar & Zaccari], 591

pre-induction, particulate antacids and (correspondence) [Gibbs & Banner], 592

outpatient, zomepirac and codeine compared as analgesic pre-

medicants for (clinical report) [Dunn, Morison, Fargas-Babjak, & Goldsmith], 265

**pediatric(s)**

child abuse in (editorial view) [Betts & Nicholson], 115

delayed awakening from, and child abuse (clinical report) [Ott, Pollack, Riddick, Reisch, & Epstein], 178

DiGeorge syndrome (clinical report) [Flashburg, Dunbar, August, & Watson], 479

Dinamap® adaptation for neonatal blood pressure determination during (correspondence) [Zmyslowski & Lena], 583

in Duchenne muscular dystrophy, malignant hyperthermia during (clinical report) [Brownell, Paasuke, Elash, Fowlow, Seagram, Diewold, & Friesen], 180

epinephrine-halothane interactions during [Karl, Swedlow, Lee, & Downes], 142

and gas scavenging for laser surgery of infant subglottic stenosis (clinical report) [Rita, Seleny, & Holinger], 191

halothane in, baroresponse and cardiovascular depression by (correspondence) [Friesen], 387

halothane in, baroresponse and cardiovascular depression by (correspondence) [Ware, Robinson, & Gregory], 387

halothane in, and epinephrine during, for closure of cleft palate (clinical report) [Ueda, Hirakawa, & Mae], 574

hazard of continuous flush systems for vascular pressure monitoring during (clinical report) [Murray & Todd], 187

neuromuscular effects of vecuronium in [Fisher & Miller], 519

risk factors, and prospective evaluation of cardiac risk index (clinical report) [Jeffrey, Kunsman, Cullen, & Brewster], 462

**Anesthesia machines, see under Equipment**

**Anesthetic techniques****hypotension****induced**

cerebrovascular response to, in hypertensive rats [Hoffman, Miletich, & Albrecht], 326

nitroglycerin, and nitroprusside, in pulmonary hypertension [Pearl, Rosenthal, & Ashton], 514

nitroprusside, in ewes, plasma renin, catecholamine, and vasopressin during [Zubrow, Daniel, Stark, Husain, & James], 245

nitroprusside, and nitroglycerin, in pulmonary hypertension [Pearl, Rosenthal, & Ashton], 514

and sodium thiosulfate disposition in humans [Ivankovich, Braverman, Stephens, Shulman, & Heyman], 11

hypothermia, in pregnancy (clinical report) [Stänge & Halldin], 460

intravenous, bier block, acute bupivacaine toxicity as result of venous leakage during (clinical report) [Rosenberg, Kalso, Tuominen, & Lindén], 95

nasopharyngeal insufflation, non-rebreathing, for laser surgery of infant subglottic stenosis (clinical report) [Rita, Seleny, & Holinger], 191

neurolept anesthesia, in moyamoya disease (correspondence) [Sumikawa & Nagai], 204

**peridural****epidural**

air embolism and (correspondence) [Larson], 587

air embolism and (correspondence) [Naulty], 588

hazard of new catheter for (correspondence) [Frankhouser], 293

hazard of new catheter for (correspondence) [Lingenfelter], 292

- measurement of catheter length for (correspondence) [Horow], 198
- morphine, biphasic depression of ventilatory responses to CO<sub>2</sub> following [Kafer, Brown, Scott, Findlay, Butz, Teeple, & Ghia], 418
- morphine, Japanese pioneer in clinical use of (correspondence) [Matsuki], 289
- morphine, pharmacokinetic aspects of [Nordberg, Hedner, Mellstrand, & Dahlstrom], 545
- morphine, for postcesarean patient [Cohen & Woods], 500
- narcotic, influence of epinephrine as adjuvant to [Bromage, Camporesi, Durant, & Nielsen], 257
- optimal test dose for (correspondence) [Stonham & Moss], 389
- spread of analgesia in, in early pregnancy (clinical report) [Fagraeus, Urban, & Bromage], 184
- lumbar, advantage of prone position approach in (clinical report) [Mustafa, Milliken, & Bizzarri], 464
- lumbar, spread of analgesia in, in early pregnancy (clinical report) [Fagraeus, Urban, & Bromage], 184
- regional**
- brachial plexus, bilateral spread of analgesia following (clinical report) [Lombard & Couper], 472
- and prone position approach to lumbar epidural space (clinical report) [Mustafa, Milliken, & Bizzarri], 464
- sympathetic block, in treatment of causalgia (correspondence) [Szeinfeld & Pallares], 295
- sympathetic block, in treatment of causalgia (correspondence) [Teeple & Ghia], 294
- selection, "ATTENDING" computer system in (special article) [Miller], 362
- spinal**
- fentanyl in suppression of WDR neurons [Suzukawa, Matsumoto, Collins, Kitahata, & Yuge], 510
- morphine, suppression of noxiously evoked WDR dorsal horn neuronal activity by [Homma, Collins, Kitahata, Matsumoto, & Kawahara], 232
- and precipitation of local anesthetic drugs in cerebrospinal fluid (correspondence) [Dudziak], 388
- transcutaneous electrical stimulation, and nitrous oxide, effects of, on brain potentials elicited by painful stimulation [Chapman, Schimek, Gehrig, Gerlach, & Colpitts], 250
- Anesthetics**
- gases**
- nitrous oxide**
- age-dependent alterations in requirements of, in mice, [Koblin, Lurz, & Eger], 428
- and enflurane anesthesia, systemic vascular responses to atracurium during [Hilgenberg, Stoelting, & Harris], 242
- interacts with opiate receptors (correspondence) [Gillman & Lichtigfeld], 483
- and intraoperative tension pneumocephalus (correspondence) [Frost], 197
- local metabolic effects of somatosensory stimulation in central nervous system following [Crosby, Crane, Jehle, & Sokoloff], 38
- moyamoya disease and (correspondence) [Sumikawa & Nagai], 204
- and naloxone and its analeptic effect (correspondence) [Gillman & Lichtigfeld], 287
- and prevention of tension pneumocephalus after craniotomy (correspondence) [Friedman], 196
- symptomatic pneumocephalus after translabrynthine acoustic neuroma excision and (clinical report) [Miller & Furman], 281
- and transcutaneous electrical stimulation, effects of, on brain potentials elicited by painful stimulation [Chapman, Schimek, Gehrig, Gerlach, & Colpitts], 250
- withdrawal syndrome [Ruppreht, Dworacek, Ducardus, Schmitz, & Dzoljic], 524
- intravenous**
- droperidol, effects on refractoriness of accessory pathway in Wolff-Parkinson-White syndrome [Gómez-Arnau, Márquez-Montes, & Avello], 307
- droperidol, nalbuphine and, for local standby sedation (correspondence) [Klein], 397
- fentanyl**
- effects on refractoriness of accessory pathway in Wolff-Parkinson-White syndrome [Gómez-Arnau, Márquez-Montes, & Avello], 307
- halothane, and no anesthesia, compared during coronary ligation [MacLeod, Augereau, & Walker], 44
- high-dose, for neuroanesthesia (clinical report) [Shupak, Harp, Stevenson-Smith, Rossi, & Buchheit], 579
- postoperative rigidity following (clinical report) [Christian, Waller, & Moldenhauer], 275
- truncal rigidity induced by, attenuation of (clinical report) [Jaffe & Ramsey], 562
- ketamine**
- blood pressure control during use of, following guanethidine treatment [Miller, Beckman, Woodside, Althaus, & Peach], 32
- and measuring regional cerebral glucose utilization (correspondence) [Crosby & Sokoloff], 291
- and measuring regional cerebral glucose utilization (correspondence) [Hawkins, Hass, & Ransohoff], 290
- in study of cerebrovascular response to hypotension in hypertensive rats [Hoffman, Miletich, & Albrecht], 326
- treatment of status epilepticus (correspondence) [Sybert & Kuff], 203
- midazolam, and thiopental, ventilation after [Gross, Zebrowski, Carel, Gardner, & Smith], 540
- pentobarbital**
- alterations in influenza virus pulmonary pathology induced by [Knight, Bedows, Nahrwold, Maassab, Smitka, & Busch], 209
- anesthesia in dog, arrhythmogenic plasma levels of epinephrine during [Sumikawa, Ishizaka, & Suzuki], 322
- local metabolic effects of somatosensory stimulation in central nervous system following [Crosby, Crane, Jehle, & Sokoloff], 38
- 24 hours, whole body and organ system tolerance during [Gronert, Michenfelder, Steen, & Milde], 18
- thiopental**
- arrhythmias induced by, in dogs (correspondence) [Dresel & Smith], 395
- arrhythmias induced by, in dogs (correspondence) [Seeler & Thurmon], 394
- and hypothermia, effects of, on cerebral oxygen consumption [Steen, Newberg, Milde, & Michenfelder], 527
- midazolam and, ventilation after [Gross, Zebrowski, Carel, Gardner, & Smith], 540

role of metabolism and protein binding in [Burch & Stanski], 146

**local****bupivacaine**

as epidural test dose (correspondence) [Stonham & Moss], 389  
cardiotoxicity, in pregnant patient with mitral valve prolapse (correspondence) [Conklin & Ziadlou-Rad], 596

in comparison of bronchodilator aerosols [Downes, Hirshman, & Leon], 216

precipitation of, in cerebrospinal fluid (correspondence) [Dudziak], 388

toxicity, as result of venous leakage during Bier block (clinical report) [Rosenberg, Kalso, Tuominen, & Lindén], 95

cocaine, inhibition of  $\gamma$ -aminobutyric acid release from synaptosomes by [Ikeda, Dohi, & Tsujimoto], 495

etidocaine, toxicity to, in adult, newborn, and fetal sheep [Morishima, Pedersen, Finster, Feldman, & Covino], 342

hexylcaine, in comparison of bronchodilator aerosols [Downes, Hirshman, & Leon], 216

**lidocaine**

in comparison of bronchodilator aerosols [Downes, Hirshman, & Leon], 216

and halothane, epinephrine during, for closure of cleft palate (clinical report) [Ueda, Hirakawa, & Mae], 574

inhibition of  $\gamma$ -aminobutyric acid release from synaptosomes by [Ikeda, Dohi, & Tsujimoto], 495

pretreatment, failure to initiate electroconvulsive seizures following (clinical report) [Hood & Mecca], 379

**procaine**

in comparison of bronchodilator aerosols [Downes, Hirshman, & Leon], 216

inhibition of  $\gamma$ -aminobutyric acid release from synaptosomes by [Ikeda, Dohi, & Tsujimoto], 495

tetracaine, inhibition of  $\gamma$ -aminobutyric acid release from synaptosomes by [Ikeda, Dohi, & Tsujimoto], 495

**volatile**

diethyl ether, alterations in influenza virus pulmonary pathology induced by [Knight, Bedows, Nahrwold, Maassab, Smitka, & Busch], 209

diethyl ether, isoflurane, and halothane, anesthetic potencies of, for various end points of anesthesia (laboratory report) [Kissin, Morgan, & Smith], 88

**enflurane**

alterations in influenza virus pulmonary pathology induced by [Knight, Bedows, Nahrwold, Maassab, Smitka, & Busch], 209

anesthesia in dog, arrhythmogenic plasma levels of epinephrine during [Sumikawa, Ishizaka, & Suzuki], 322

anesthetic potency for, heart rate response to nociceptive stimulation as index of (correspondence) [Kissin & Morgan], 109

blood pressure control during use of, following guanethidine treatment [Miller, Beckman, Woodside, Althaus, & Peach], 32

effects of, myocardial loading conditions determining [Zimpher, Gilly, Krosi, Schlag, & Steinbreithner], 159

or halothane, cerebral blood volume and CSF pressure during [Artru], 533

and halothane, effects of, on right ventricular performance during pentobarbital sodium anesthesia [Mote, Pruett, & Gramling], 53

hepatic necrosis induced by, in triiodothyronine-pretreated rats [Berman, Kuhnert, Phythyon, & Holaday], 1

influence of, on SA node [Bosnjak & Kampine], 314

isoflurane, and methoxyflurane metabolism in rat hepatic microsomes from ethanol-treated animals [Van Dyke], 221

metabolism by rat hepatic microsomes of, following ethanol consumption [Rice, Dooley, & Mazze], 237

and nitrous-oxide anesthesia, systemic vascular responses to atracurium during [Hilgenberg, Stoelting, & Harris], 242

**halothane**

alterations in influenza virus pulmonary pathology induced by [Knight, Bedows, Nahrwold, Maassab, Smitka, & Busch], 209

anesthesia in dog, arrhythmogenic plasma levels of epinephrine during [Sumikawa, Ishizaka, & Suzuki], 322

ATP depletion induced by, in platelets from patients susceptible to malignant hyperthermia [Giger & Kaplan], 347

blood pressure control during use of, following guanethidine treatment [Miller, Beckman, Woodside, Althaus, & Peach], 32

or enflurane, cerebral blood volume and CSF pressure during [Artru], 533

and enflurane, effects of, on right ventricular performance during pentobarbital sodium anesthesia [Mote, Pruett, & Gramling], 53

epinephrine during, for closure of cleft palate (clinical report) [Ueda, Hirakawa, & Mae], 574

-epinephrine interactions in children [Karl, Swedlow, Lee, & Downes], 142

fentanyl, and no anesthesia, compared during coronary ligation [MacLeod, Augereau, & Walker], 44

hepatic necrosis induced by, in triiodothyronine-pretreated rats [Berman, Kuhnert, Phythyon, & Holaday], 1

hepatotoxicity, etiology of (correspondence) [Strunin, Harrison, & Davies], 391

influence of, on SA node [Bosnjak & Kampine], 314

inhibits microbicidal oxidative activity of pulmonary alveolar macrophages (laboratory report) [Welch], 456

and isoflurane, comparison of safety margins of (laboratory report) [Kissin, Morgan, & Smith], 556

isoflurane, and diethyl ether, anesthetic potencies of, for various end points of anesthesia (laboratory report) [Kissin, Morgan, & Smith], 88

moyamoya disease and (correspondence) [Sumikawa & Nagai], 204

normalization of cerebral blood flow during prolonged use of [Albrecht, Miletich, & Madala], 26

sensitization of carotid sinus baroreceptors, extent and mechanism of [Seagard, Hopp, Bosnjak, Elegbe, & Kampine], 432

**isoflurane**

atracurium in surgical patients receiving [Sokoll, Gergis, Mehta, Ali, & Lineberry], 450

enflurane, and methoxyflurane metabolism in rat hepatic microsomes from ethanol-treated animals [Van Dyke], 221

and halothane, comparison of safety margins of (laboratory report) [Kissin, Morgan, & Smith], 556

halothane, and diethyl ether, anesthetic potencies of, for various end points of anesthesia (laboratory report) [Kissin, Morgan, & Smith], 88

- hepatic necrosis induced by, in triiodothyronine-pretreated rats [Berman, Kuhnert, Phythyon, & Holaday], 1  
influence of, on SA node [Bosnjak & Kampine], 314  
long-term succinylcholine infusion during [Donati & Bevan], 6  
potentiation of succinylcholine phase II block with [Donati & Bevan], 552
- methoxyflurane**  
enflurane, and isoflurane metabolism in rat hepatic microsomes from ethanol-treated animals [Van Dyke], 221  
metabolism by rat hepatic microsomes of, following ethanol consumption [Rice, Dooley, & Mazze], 237  
sevoflurane, metabolism by rat hepatic microsomes of, following ethanol consumption [Rice, Dooley, & Mazze], 237
- Ankylosing spondylitis, see under Complications**
- Antacids**  
**particulate**  
neutralizing capacity of (correspondence) [Eyler & Zaccari], 591  
neutralizing capacity of (correspondence) [Gibbs & Banner], 592
- Antagonists**  
**narcotic**  
**naloxone**  
and its analeptic effect (correspondence) [Gillman & Lichtigfeld], 287  
following high-dose fentanyl for neuroanesthesia (clinical report) [Shupak, Harp, Stevenson-Smith, Rossi, & Buchheit], 579  
in study of nitrous oxide withdrawal syndrome [Ruprecht, Dworacek, Ducardus, Schmitz, & Dzoljic] 524
- neuromuscular relaxants**  
and clinical pharmacology of BWA444U [Savarese, Ali, Basta, Sunder, Moss, Gionfriddo, Lineberry, Wastila, El-Sayad, Montague, & Braswell], 333  
neostigmine, and pyridostigmine, in renal failure, prolonged effect of succinylcholine after (clinical report) [Bishop & Hornbein], 384  
pyridostigmine, and neostigmine, in renal failure, prolonged effect of succinylcholine after (clinical report) [Bishop & Hornbein], 384
- Antidiuretic hormone, see under Hormones**
- Arrest, cardiac, see under Complications**
- Arrhythmias, see under Complications; Heart**
- Arteries**  
arteriovenous malformation, therapeutic embolization of, pulmonary embolism during (clinical report) [Capan, Lardizabal, Sinha, Ashok, Berenstein, & Turndorf], 569  
pulmonary, smooth muscle of, pulmonary vascular response is dependent upon initial state of (correspondence), [Bagshaw & Cox], 205
- Arteriovenous malformation, see under Arteries**
- Arthritis, see under Complications**
- Arthroplasty, see under Surgery**
- Aspiration, see under Complications; Lung(s)**
- Asthma, see under Complications; Lung(s)**
- Ataractics**  
phenothiazines, chlorpromazine, and delayed awakening from anesthesia (clinical report) [Ott, Pollack, Riddick, Reisch, & Epstein], 178
- Atelectasis, see under Complications; Lung(s)**
- Atkinson, R. S., and Hewer, C. L. (eds.), *Recent Advances in Anaesthesia and Analgesia, No. 14* (book review), 398
- Autotransfusion, see under Transfusion**
- B**
- Balanced anesthesia, see under Anesthesia**
- Barbiturates, see under Hypnotics**
- Baroreceptors, see under Receptors**
- Baroresponse, see under Reflexes**
- Basal ganglia, see under Brain**
- Bier block, see under Anesthetic techniques, intravenous**
- Binding, see under Protein; Receptor**
- Biotransformation**  
(drugs), by rat hepatic microsomes, following ethanol consumption [Rice, Dooley, & Mazze], 237  
inorganic fluoride, and enflurane metabolism in rat hepatic microsomes from ethanol-treated animals [Van Dyke], 221
- Bleeding, see under Blood, coagulation; Complications; Hemorrhage**
- Blitt, C. D., *Catheterization Techniques for Invasive Cardiovascular Monitoring* (book review), 111
- Block, bilateral, see under Complications**
- Blood**  
disease transmission, acquired immunodeficiency syndrome (editorial view) [Miller & Bove], 493  
disseminated intravascular coagulation, following midtrimester abortions (clinical report) [White, Coe, Dworsky, & Margolis], 99  
hemodilution, estimating allowable blood loss (clinical report) [Gross], 277
- loss**  
estimating allowable: corrected for dilution (clinical report) [Gross], 277  
massive occult retroperitoneal, during hip surgery (clinical report) [Brizgys & Hicks], 473  
platelets, halothane-induced ATP depletion in, from patients susceptible to malignant hyperthermia [Giger & Kaplan], 347  
products, acquired immunodeficiency syndrome (AIDS) and (editorial view) [Miller & Bove], 493  
replacement, and estimation of allowable blood loss (clinical report) [Gross], 277
- Blood-brain barrier, see under Brain**
- Blood pressure**  
baroreceptor reflexes, halothane sensitization of, [Seagard, Hopp, Bosnjak, Elegbe, & Kampine], 432
- control**  
in infants, and baroresponse by halothane (correspondence) [Friesen], 387  
in infants, and baroresponse by halothane (correspondence) [Ware, Robinson, & Gregory], 387  
drug effects, in patients undergoing coronary artery bypass grafting [Morris, Cahalan, Miller, Wilkinson, Quasha, & Robinson], 438
- hypertension**  
pulmonary, nitroglycerin and nitroprusside in [Pearl, Rosenthal, & Ashton], 514  
in rats, cerebrovascular response to hypotension in [Hoffman, Miletich, & Albrecht], 326

**hypotension**

- in hypertensive rats, cerebrovascular response to [Hoffman, Miletich, & Albrecht], 326
- trimethaphan, brain electrical activity and organ integrity during [Dong, Bledsoe, Eng, Heavner, Shaw, Hornbein, & Anderson], 61
- monitoring of, neonatal, Dinamap® adaptation for (correspondence) [Zmyslowski & Lena], 583

**Body temperature, see under Temperature****Book reviews**

- Atkinson, R. S., and Hewer, C. L. (eds.), *Recent Advances in Anaesthesia and Analgesia, No. 14*, 398
- Blitt, C. D., *Catheterization Techniques for Invasive Cardiovascular Monitoring*, 111
- Cowley, R. A., and Dunham, C. M. (eds.), *Shock Trauma/Critical Care Manual: Initial Assessment and Management*, 112
- Cowley, R. A., and Trump, B. F. (eds.), *Pathophysiology of Shock, Anoxia, and Ischemia*, 112
- Gothard, J. W. W., and Branthwaite, M. A., *Anaesthesia for Thoracic Surgery*, 304
- Grundy, B. L., and Gravenstein, J. S. (eds.), *The Quality of Care in Anesthesia*, 207
- Guenther, C. A., and Welch, M. H., *Pulmonary Medicine, Second Edition*, 111
- Petty, C., *Research Techniques in the Rat*, 111
- Petty, T. L., *Intensive and Rehabilitative Respiratory Care*, 304
- Stevens, A. J. (ed.), *Preparation for Anaesthesia*, 207
- Varkey, G. P. (ed.), *International Anesthesiology Clinics: Anesthetic Considerations in the Surgical Repair of Intracranial Aneurysms*, 398
- Wood, M., and Wood, A. J. J. (eds.), *Drugs and Anesthesia. Pharmacology for Anesthesiologists*, 597

**Bowel, see under Colon****Brachial plexus block, see under Anesthetic techniques, regional****Brain**

- acetylcholine, in nitrous oxide withdrawal syndrome [Rupprecht, Dworacek, Ducardus, Schmitz, & Dzoljic], 524
- $\gamma$ -aminobutyric acid, release, inhibition of, from synaptosomes by local anesthetics [Ikeda, Dohi, & Tsujimoti], 495
- autoregulation, and cerebrovascular response to hypotension in hypertensive rats [Hoffman, Miletich, & Albrecht], 326
- basal ganglia, disorder of, anesthetic management in (clinical report) [Roy, McLain, Wise, & Shaffner], 382

**blood flow**

- and CSF pressure during anesthesia with halothane or enflurane [Artru], 533
- during 24 hours deep pentobarbital anesthesia [Gronert, Michenfelder, Steen, & Milde], 18
- normalization of, during prolonged halothane anesthesia [Albrecht, Miletich, & Madala], 26
- blood-brain barrier, glycine and (correspondence) [Larson], 488
- blood volume, and CSF pressure during anesthesia with halothane or enflurane [Artru], 533
- convulsions, local anesthetic-induced, and inhibition of  $\gamma$ -aminobutyric acid release from synaptosomes [Ikeda, Dohi, & Tsujimoti], 495

**electroencephalogram**

- during profound arterial hypotension [Dong, Bledsoe, Eng, Heavner, Shaw, Hornbein, & Anderson], 61
- hypothermia and (correspondence) [Levy], 396
- hypothermia and (correspondence) [Sharbrough, Quasha, & Tinker], 396

endorphins, in nitrous oxide withdrawal syndrome [Rupprecht, Dworacek, Ducardus, Schmitz, & Dzoljic], 524

epilepsy, facial pain in, induced by music (correspondence) [Yanagida], 388

**evoked potential**

- during profound arterial hypotension [Dong, Bledsoe, Eng, Heavner, Shaw, Hornbein, & Anderson], 61
- elicited by painful stimulation, effects of nitrous oxide and transcutaneous electrical stimulation on [Chapman, Schimek, Gehrig, Gerlach, & Colpitts], 250
- sensory, intraoperative monitoring of (medical intelligence) [Grundy], 72

**glucose utilization**

- with pentobarbital or nitrous oxide [Crosby, Crane, Jehle, & Sokoloff], 38
- regional, potential pitfalls in measuring (correspondence) [Crosby & Sokoloff], 291
- regional, potential pitfalls in measuring (correspondence) [Hawkins, Hass, & Ransohoff], 290
- intracranial pressure, and cerebral blood volume with halothane or enflurane [Artru], 533

**metabolism**

- during 24 hours deep pentobarbital anesthesia [Gronert, Michenfelder, Steen, & Milde], 18
- effects of hypothermia and barbiturates on [Steen, Newberg, Milde, & Michenfelder], 527
- and measuring regional cerebral glucose utilization (correspondence) [Crosby & Sokoloff], 291
- and measuring regional cerebral glucose utilization (correspondence) [Hawkins, Hass, & Ransohoff], 290
- normalization of, during prolonged halothane anesthesia [Albrecht, Miletich, & Madala], 26
- regional, with pentobarbital or nitrous oxide [Crosby, Crane, Jehle, & Sokoloff], 38
- moyamoya disease, and anesthesia (correspondence) [Sumikawa & Nagai], 204

**oxygen consumption**

- during 24 hours deep pentobarbital anesthesia [Gronert, Michenfelder, Steen, & Milde], 18
- effects of hypothermia and barbiturates on [Steen, Newberg, Milde, & Michenfelder], 527
- pneumocephalus, after translabrynthine acoustic neuroma excision and nitrous oxide anesthesia (clinical report) [Miller & Furman], 281
- somatosensory-evoked potentials, intraoperative loss of (correspondence) [Raudzens], 593
- stimulation, with pentobarbital or nitrous oxide [Crosby, Crane, Jehle, & Sokoloff], 38
- subdural space, air flow into, and pneumocephalus, during neuroma excision and nitrous oxide anesthesia (clinical report) [Miller & Furman], 281
- synaptosomes, inhibition of  $\gamma$ -aminobutyric acid release from, by local anesthetics [Ikeda, Dohi & Tsujimoti], 495

**tension pneumocephalus**

- (correspondence) [Marshall], 301
- intraoperative, nitrous oxide and (correspondence) [Frost], 197
- prevention of, after craniotomy, nitrous oxide and (correspondence) [Friedman], 196

**Bronchus, see under Lung(s)****Bupivacaine, see under Anesthetics, local****BW A444U, see under Neuromuscular relaxants**

Bypass grafting, coronary artery, *see* under Surgery, cardiac  
Bypass valve, *see* under Equipment

## C

Calcium, *see* under Ions

## Cancer

Kaposi's sarcoma, acquired immunodeficiency syndrome (AIDS) and blood products and (editorial view) [Miller & Bove], 493

Cannulas, *see* under Equipment

Cannulation, *see* under Anatomy, specific vessels; Veins

Calcium channel blockers, *see* under Sympathetic nervous system

## Carbon dioxide

### rebreathing

and Bain circuit (correspondence) [Dean & Keenan], 393  
and Bain circuit (correspondence) [Nott & Norman], 392  
ventilatory response after thiopental and midazolam [Gross, Zebrowski, Carel, Gardner, & Smith], 540

Carbon dioxide response, *see* under Ventilation

Cardiac anesthesia, *see* under Anesthesia

Cardiac arrest, *see* under Complications

Cardiac output, *see* under Heart

Cardiac surgery, *see* under Surgery

Cardiotoxicity, *see* under Heart

Cardiovascular anesthesia, *see* under Anesthesia

Catecholamines, *see* under Sympathetic nervous system

Catheters, *see* under Equipment

Cerebral glucose utilization, regional, *see* under Measurement techniques

## Cerebrospinal fluid

volume, and precipitation of local anesthetic drugs into (correspondence) [Dudziak], 388

Cesarean section, *see* under Anesthesia, obstetric; Pregnancy

Child(ren), *see* under Age factors; Anesthesia, pediatric

Chlorpromazine, *see* under Ataractics, phenothiazines

Cholinesterase, *see* under Enzymes

Circuits, anesthetic, *see* under Equipment

Citrate, *see* under Metabolism; Toxicity; Transfusion

Coagulation, *see* under Blood

Cocaine, *see* under Anesthetics, local

Codeine, *see* under Analgesics, narcotic

Colon, *see* under Gastrointestinal tract

Compliance, *see* under Heart; Lung(s); Veins

## Complications

### air embolism

detection of (editorial view), [Albin], 113  
in insertion of epidural catheter (correspondence) [Larson], 587  
in insertion of epidural catheter (correspondence) [Naulty], 588  
transesophageal Doppler for detection of [Martin & Colley], 117  
transesophageal echocardiography for detection of [Furuya, Suzuki, Okumura, Kishi, & Uefuji], 124

ammonia intoxication, from glycine absorption during urologic surgery (clinical report) [Roesch, Stoelting, Lingeman, Kahnoski, Backes, & Gephardt], 577

anesthetic, in bupivacaine toxicity as result of venous leakage during Bier block (clinical report) [Rosenberg, Kalso, Tuominen, & Lindén], 95

ankylosing spondylitis, anesthetic management for surgical corrections of (clinical report) [Ovassapian, Land, Schafer, Cerullo, & Zalkind], 370

arrest, cardiac, in embolism secondary to limb exsanguination (clinical report) [Pollard, Lovelock, & Jones], 373

## arrhythmia

in epinephrine during halothane for closure of cleft palate (clinical report) [Ueda, Hirakawa, & Mae], 574

prevention of, in Wolff-Parkinson-White syndrome [Gómez-Arnau, Márquez-Montes, & Avello], 307

arthritis, acquired laryngeal deviation associated with cervical spine disease in [Keenan, Stiles, & Kaufman], 441

## aspiration

particulate antacids and (correspondence) [Eyler & Zaccari], 591  
particulate antacids and (correspondence) [Gibbs & Banner], 592

aspiration pneumonia, sodium citrate for prophylaxis against (correspondence) [Stoops, Ravindran, & Viegas], 201

bilateral block, spread of, following interscalene brachial plexus block (clinical report) [Lombard & Couper], 472

bleeding, in disseminated intravascular coagulation following mid-trimester abortions (clinical report) [White, Coe, Dworsky, & Margolis], 99

cardiac, in bupivacaine toxicity as result of venous leakage during Bier block (clinical report) [Rosenberg, Kalso, Tuominen, & Lindén], 95

## catheters

pulmonary artery, in Eisenmenger's syndrome (correspondence) [Noble, Devitt, & Byrick], 589

pulmonary artery, in Eisenmenger's syndrome (correspondence) [Robinson], 588

causalgia, treatment of (correspondence) [Szeinfeld & Pallares], 295

causalgia, treatment of (correspondence) [Teeple & Chia], 294

## convulsions

after translabrynthine acoustic neuroma excision and nitrous oxide anesthesia (clinical report) [Miller & Furman], 281

in bupivacaine toxicity as result of venous leakage during Bier block (clinical report) [Rosenberg, Kalso, Tuominen, & Lindén], 95

delayed awakening, in ammonia intoxication during urologic surgery (clinical report) [Roesch, Stoelting, Lingeman, Kahnoski, Backes, & Gephardt], 577

diagnosis, x-ray, metrizamide and (correspondence) [Pyles & Pashayan], 590

edema, pulmonary, intravenous verapamil to relieve, in mitral valve disease (clinical report) [Kopman], 374

emphysema, subcutaneous, from faulty resuscitation bag (clinical report) [Jumper, Desai, Liu, & Philip], 572

## equipment

adapter kit is available to update APL valves (correspondence) [Luich], 200

cluttered, as cause for hypoxia (correspondence) [Henling & Diaz], 288

disposable (correspondence) [Thys], 203

new epidural catheter (correspondence) [Frankhouser], 293

new epidural catheter (correspondence) [Lingenfelter], 292

## equipment failure

anesthesia machine (correspondence) [Julien], 584

anesthesia machine (correspondence) [McMahon, Holm, & Barta], 586

anesthesia machine, manufacturer's comment on (correspondence) [Luich], 585

anesthesia machine, manufacturer's comment on (correspondence) [Rosano], 587

- explosions, of colonic gas mixtures, etiologic factors in (correspondence) [Freund & Radke], 196
- explosions, of colonic gas mixtures, etiologic factors in (correspondence) [Rumley], 195
- hydrothorax, right, after left external jugular vein catheterization (clinical report) [Ghani & Berry], 93
- hypertension**
- after intraoperative autotransfusion in bilateral adrenalectomy for pheochromocytoma (clinical report) [Smith, Mihm, & Mefford], 182
- pulmonary, pulmonary vascular response to (correspondence), [Bagshaw & Cox], 205
- hypokalemic familial periodic paralysis (clinical report) [Melnick, Chang, Larson, & Bedger], 263
- internal cuff herniation, as cause of tracheal tube obstruction (correspondence) [Famewo], 593
- Kawasaki disease, anesthetic implications (clinical report) [McNiece & Krishna], 269
- malignant hyperthermia, halothane-induced ATP depletion in platelets from patients susceptible to [Giger & Kaplan], 347
- mucocutaneous lymph node syndrome, anesthetic implications (clinical report) [McNiece & Krishna], 269
- nasotracheal intubation, guided (correspondence) [Adams], 105
- paralysis, of accessory nerve after cannulation of internal jugular vein (correspondence) [Hoffman], 583
- pneumocephalus**
- after craniotomy, nitrous oxide and prevention of (correspondence) [Friedman], 196
- intraoperative tension, nitrous oxide and (correspondence) [Frost], 197
- pulmonary barotrauma, accidental disconnection and (correspondence) [Rendell-Baker & Meyer], 286
- rigidity**
- fentanyl-induced, attenuation of (clinical report) [Jaffe & Ramsey], 562
- following fentanyl anesthesia (clinical report) [Christian, Waller, & Moldenhauer], 275
- seizures, after metrizamide (correspondence) [Pyles & Pashayan], 590
- status epilepticus, ketamine treatment of (correspondence) [Sybert & Kyff], 203
- tension pneumocephalus**
- (correspondence) [Marschall], 301
- intraoperative, nitrous oxide and (correspondence) [Frost], 197
- prevention of, after craniotomy, nitrous oxide and (correspondence) [Friedman], 196
- weakness, hypokalemic familial periodic paralysis (clinical report) [Melnick, Chang, Larson, & Bedger], 263
- Computers, see under Measurement techniques; Records, anesthesia; Statistics**
- Congenital defects, see under Genetic factors; individual organs**
- Connectors, see under Equipment**
- Contractility, see under Heart; Muscle; Uterus**
- Contrast media, see under Pharmacology**
- Convulsions, see under Anticonvulsants; Brain; Complications; Toxicity**
- Coronary occlusion, see under Heart**
- Cowley, R. A., and Dunham, C. M. (eds.), *Shock Trauma/Critical Care Manual: Initial Assessment and Management* (book review), 112
- and Trump, B. F. (eds.), *Pathophysiology of Shock, Anoxia, and Ischemia* (book review), 112
- Cpss (50), see under Potency, anesthetic**
- Craniotomy, see under Surgery**
- Crossmatch, see under Transfusion**
- Cuffs, see under Equipment**
- Cyanide, see under Toxicity**
- D**
- Dantrolene, see under Neuromuscular relaxants**
- Deep body thermometry, see under Measurement techniques**
- Delayed awakening, see under Complications**
- Delirium, see under Psychologic responses; Recovery**
- Delivery systems, see under Oxygen**
- Diet, see under Nutrition**
- Diethyl ether, see under Anesthetics, volatile**
- Digitalis, see under Heart**
- DiGeorge syndrome, see under Anesthesia, pediatric**
- Disposables, see under Equipment**
- Distribution, see under Pharmacokinetics; Solubility; Ventilation**
- Doppler equipment, see under Equipment**
- Doppler monitoring, see under Monitoring**
- Doppler sensor, see under Equipment**
- Dose-response, see under Potency, anesthetic**
- Droperidol, see under Anesthetics, intravenous**
- Drugs, see under Analgesics; Anesthetics; Biotransformation (drug); Interactions; Pharmacology**
- Duchenne muscular dystrophy, see under Muscle, skeletal**
- Dysrhythmias, see under Heart**
- Dystonia, see under Muscle, skeletal**
- E**
- Ear**
- eustachian tube, neuroma excision, and nitrous oxide anesthesia, symptomatic pneumocephalus after (clinical report) [Miller & Furman], 281
- middle ear, neuroma excision, and nitrous oxide anesthesia, symptomatic pneumocephalus after (clinical report) [Miller & Furman], 281
- ED50, see under Potency, anesthetic**
- Edema, see under Complications; specific systemic sites**
- Education**
- critiquing anesthetic management in, "ATTENDING" computer system for (special article) [Miller], 362
- publications, use of negative exponents in (editorial view) [Michenfelder], 305
- Eisenmenger's syndrome, see under Lung(s)**
- Electroconvulsive therapy**
- complications of, propranolol in prophylaxis of (clinical report) [Hood & Mecca], 379
- Electroencephalography, see under Brain; Monitoring**
- Electrolytes, see under Acid-base equilibrium; Fluid balance; Ions**
- Embolism**
- air**
- detection of (editorial view) [Albin], 113
- prevention of, in insertion of epidural catheter (correspondence) [Larson], 587



- prevention of, in insertion of epidural catheter (correspondence) [Naulty], 588  
risk of, during catheter placement (correspondence) [Munshi & Rouman], 206  
risk of, during catheter placement (correspondence) [Westheimer], 206  
transesophageal Doppler for detection of [Martin & Colley], 117  
transesophageal echocardiography for detection of [Furuya, Suzuki, Okumura, Kishi, & Uefuji], 124  
and valve competence of pulmonary artery catheter introducers (clinical report) [Conahan, Barberii, & Calkins], 189  
pulmonary, silicone, during therapeutic arterial embolization (clinical report) [Capan, Lardizabal, Sinha, Ashok, Berenstein, & Turndorf], 569  
therapeutic, silicone, acute pulmonary embolism during (clinical report) [Capan, Lardizabal, Sinha, Ashok, Berenstein, & Turndorf], 569  
thromboembolism, fatal, secondary to limb exsanguination (clinical report) [Pollard, Lovelock, & Jones], 373
- Embolizing substance, see under Embolism**
- Emphysema, see under Complications**
- End-exhalation, see under Ventilation**
- Endorphins, see under Brain; Polypeptides**
- Endotracheal intubation, see under Intubation**
- Endotracheal tubes, see under Equipment**
- Enflurane, see under Anesthetics, volatile**
- Enzymes**  
cholinesterase, inhibitors, and nitrous oxide withdrawal syndrome [Ruprecht, Dworacek, Ducardus, Schmitz, & Dzoljic], 524  
pseudocholinesterase, in prolonged effect of succinylcholine in renal failure (clinical report) [Bishop & Hornbein], 384
- Epidural anesthesia, see under Anesthetic techniques, peridural**
- Epilepsy, see under Brain**
- Epinephrine, see under Heart, arrhythmias; Sympathetic nervous system, catecholamines**
- Equipment**  
adapters, and simple system for transtracheal ventilation (correspondence) [Gildar], 106  
airway device, for ophthalmic and head and neck surgery (correspondence) [Bedger, Chang, Larson, & Bleyaert], 199
- alarms**  
and advantages of standing bellows ventilators and low-flow techniques (correspondence) [Graham], 486  
disconnect, failure of (correspondence) [Reynolds], 488  
analyzers, oxygen, failure to use to prevent hypoxic accidents (correspondence) [Rendell-Baker & Meyer], 287
- anesthesia machine(s)**  
cluttered, as cause for hypoxia (correspondence) [Henling & Diaz], 288  
fault in, due to design and lack of maintenance (correspondence) [McMahon, Holm, & Batra], 586  
fault in, due to design and lack of maintenance, manufacturer's comment on (correspondence) [Rosano], 587  
Ohio Modulus®, tank wrench holder for (correspondence) [Wald & Neidzowski], 109  
potentially fatal fault in (correspondence) [Julien], 584  
potentially fatal fault in, manufacturer's comment on (correspondence) [Luich], 585
- bypass valve**  
faulty (correspondence) [Julien], 584  
faulty, manufacturer's comment on (correspondence) [Luich], 585
- cannulus, intravenous, standard colors for (correspondence) [Rendell-Baker], 194
- catheter(s)**  
central venous double-lumen right atrial, for open heart surgery (correspondence) [Marquez, Sassano, Winter, & Waterman], 394
- epidural**  
new, hazard of (correspondence) [Frankhouser], 293  
new, hazard of (correspondence) [Lingenfelter], 292  
technique is critical variable in (correspondence) [Larson], 587  
technique is critical variable in (correspondence) [Naulty], 588
- flow-directed**  
airway thermistor, detection of end-exhalation period by (clinical report) [Oden, Mitchell, & Benumof], 467  
flow-directed pediatric pulmonary artery, migration of (clinical report) [Moore, Mc Nicholas, Gallagher, & Niguidula], 102  
flow-directed pulmonary artery, valve competence in introducers of (clinical report) [Conahan, Barberii, & Calkins], 189  
measurement of, in epidural space (correspondence) [Horrow], 198  
placement, risk of air embolism during (correspondence) [Munshi & Rouman], 206  
placement, risk of air embolism during (correspondence) [Westheimer], 206  
pulmonary artery, in Eisenmenger's syndrome (correspondence) [Noble, Devitt, & Byrick], 589  
pulmonary artery, in Eisenmenger's syndrome (correspondence) [Robinson], 588  
for transtracheal ventilation (correspondence) [Gildar], 106  
venous, and catheter introducer sheaths, valve competence in (clinical report) [Conahan, Barberii & Calkins], 189
- circuits**  
anesthetic, inseparable (correspondence) [Thys], 203  
nonrebreathing, Bain (correspondence) [Dean & Keenan], 393  
nonrebreathing, Bain (correspondence) [Nott & Norman], 392  
computers, "ATTENDING" for critiquing anesthetic management (special article) [Miller], 362
- connectors**  
and advantages of standing bellows ventilators and low-flow techniques (correspondence) [Graham], 486  
APL valves, adapter kit available to update (correspondence) [Luich], 200  
and disconnect alarm failure (correspondence) [Reynolds], 488  
inseparable disposable (correspondence) [Thys], 203
- cuffs**  
blood pressure, Dinamap® adaptation for (correspondence) [Zmyslowski & Lena], 583  
tracheal, and obstruction of intraluminal tracheal tube (correspondence) [Famewo], 593
- disposable, inseparable (correspondence) [Thys], 203
- Doppler**  
in detection of air embolism (editorial view) [Albin], 113  
esophageal, for detection of air embolism [Martin & Colley], 117
- echocardiography**  
for detection of air embolism [Furuya, Suzuki, Okumura, Kishi, & Uefuji], 124  
in evaluation of cardiac disease (editorial view) [Albin], 113

- exhaust systems, for laser surgery of infant subglottic stenosis (clinical report) [Rita, Seleny, & Holinger], 191
- flush valve**  
slow, due to design and lack of maintenance (correspondence) [McMahon, Holm, & Batra], 586  
slow, due to design and lack of maintenance, manufacturer's comment on (correspondence) [Rosano], 587
- Hope® II resuscitation bag, faulty, pulmonary barotrauma resulting from (clinical report) [Jumper, Desai, Liu, & Philip], 572
- J-wire**  
for placement of right atrial catheter (correspondence) [Munshi & Rouman], 206  
for placement of right atrial catheter (correspondence) [Westheimer], 206
- laryngoscope**  
blade, left-entry, in right-sided oro-facial lesions (correspondence) [Lagade & Poppers], 300  
Macintosh blade, modification of (correspondence) [Ibler], 200  
machines, anesthesia, APL valves, adapter kit available to update (correspondence) [Luich], 200
- mask(s)**  
anesthesia, inseparable from circuit (correspondence) [Thys], 203  
anesthesia, for ophthalmic and head and neck surgery (correspondence) [Bedger, Chang, Larson, & Bleyaert], 199  
nasogastric tube, simpler method for insertion of (correspondence) [Huang], 107  
percutaneous catheter introducers, pulmonary artery, valve competence in (clinical report) [Conahan, Barberii, & Calkins], 189  
scavengers, colored identification bands on hoses of (correspondence) [Luich], 200  
standards, and colors for intravenous cannulas (correspondence) [Rendell-Baker], 194  
stethoscope cuff, esophageal, detachment of (correspondence) [Gandhi & Dhamee], 202  
support pads, intravenous fluid containers as (correspondence) [Brown & Cadena], 301
- tubes**  
**endotracheal**  
beware of sharp edges in (correspondence) [Skaredoff & Poppers], 595  
beware of sharp edges in (correspondence) [Weibel & Matthews], 595  
cuff design and lubrication as influence on postoperative sore throat (clinical report) [Loeser, Kaminsky, Diaz, Stanley, & Pace], 376  
intraluminal tracheal, obstruction, not so apparent cause of (correspondence) [Famewo], 593  
valves, APL, adapter kit to update (correspondence) [Luich], 200  
**ventilator(s)**  
Narco Air Shields, blistering of epoxy material of (correspondence) [Stonham & Moss], 390  
standing bellows and low-flow techniques (correspondence) [Graham], 486  
wrench holder, for Ohio Modulus® anesthesia machine (correspondence) [Wald & Neidzowski], 109
- Ethanol, see under Pharmacology**  
**Etidocaine, see under Anesthetics, local**  
**Eustachian tube, see under Ear**  
**Evoked potentials, see under Brain**
- Exhaust systems, see under Equipment**
- Explosions**  
*see also under Complications*  
**of colonic gas mixtures**  
etiologic factors in (correspondence) [Freund & Radke], 196  
etiologic factors in (correspondence) [Rumley], 195
- F**
- Fentanyl, see under Anesthetics, intravenous**  
**Fiberoptic endotracheal intubation, see under Intubation**
- Finger**  
in measurement of catheter length (correspondence) [Horrow], 198
- Flow-directed catheters, see under Equipment**
- Fluoride, see under Biotransformation; Ions**
- Fluorometabolites, see under Biotransformation (drug); Pharmacology; Toxicity**
- Flush valve, see under Equipment**
- G**
- Gallamine, see under Neuromuscular relaxants**  
**Gas exchange measurements, see under Measurement techniques**
- Gases**  
**nonanesthetic**  
explosive colonic, etiologic factors in determining (correspondence) [Freund & Radke], 196  
explosive colonic, etiologic factors in determining (correspondence) [Rumley], 195  
nitrogen, in mixing air and oxygen (correspondence) [Des-Marteau & Byles], 490
- Gases, see under Anesthetics, gases; Anesthetics, volatile; Carbon dioxide; Gases, nonanesthetic; Oxygen; Physics**
- Gastrocnemius muscle, see under Muscle**
- Gastrointestinal tract**  
**colon**  
explosive gas mixtures in, etiologic factors in (correspondence) [Freund & Radke], 196  
explosive gas mixtures in, etiologic factors in (correspondence) [Rumley], 195  
intubation, simpler method of nasogastric tube insertion for (correspondence) [Huang], 107  
ischemic damage to, following profound arterial hypotension [Dong, Bledsoe, Eng, Heavner, Shaw, Hornbein, & Anderson], 61
- stomach**  
and buffering capacity of citrate antacids (correspondence) [Conklin & Ziadlou-Rad], 391  
particulate antacids and (correspondence) [Eyler & Zaccari], 591  
particulate antacids and (correspondence) [Gibbs & Banner], 592  
and sodium citrate as antacid for Cesarean section (correspondence) [Stoops, Ravindran, & Viegas], 201
- Genetic factors**  
and age-dependent alterations in nitrous oxide requirement of mice [Koblin, Lurz, & Eger], 428
- Glucose, see under Blood; Brain; Metabolism**  
Gothard, J. W. W., and Branthwaite, M. A., *Anaesthesia for Thoracic Surgery* (book review), 304
- Growth hormone, see under Hormones**  
Grundy, B. L., and Gravenstein, J. S. (eds.), *The Quality of Care in Anesthesia* (book review), 207

**Guanethidine, see under Sympathetic nervous system**

Guenter, C. A., and Welch, M. H., *Pulmonary Medicine, Second Edition* (book review), 111

**H**

**Hallervorden-Spatz disease, see under Muscle**

**Halothane, see under Anesthetics, volatile**

**Head surgery, see under Surgery**

**Heart**

accessory pathway, fentanyl and droperidol effects on refractoriness of, in Wolff-Parkinson-White syndrome [Gómez-Arnau, Márquez-Montes, & Avello], 307

anesthetics, effects of halothane and enflurane on, during pentobarbital sodium anesthesia [Mote, Pruett, & Gramling], 53

**arrhythmias(s)**

during coronary ligation, effects of halothane, fentanyl, and no anesthesia on, compared [MacLeod, Augereau, & Walker], 44

in epinephrine-halothane interactions in children [Karl, Swedlow, Lee, & Downes], 142

and plasma levels of epinephrine during halothane, enflurane, and pentobarbital anesthesia in dog [Sumikawa, Ishizaka, & Suzuki], 322

prevention, intravenous verapamil in, in mitral valve disease (clinical report) [Kopman], 374

**thiobarbiturates induce**

in dogs (correspondence) [Dresel & Smith], 395

in dogs (correspondence) [Seeler & Thurman], 394

blood flow during 24 hours deep pentobarbital anesthesia [Gronert, Michenfelder, Steen, & Milde], 18

**cardiac output**

effects of halothane and enflurane on, during pentobarbital sodium anesthesia [Mote, Pruett, & Gramling], 53

vecuronium and pancuronium influence on, in patients undergoing coronary artery bypass grafting [Morris, Cahalan, Miller, Wilkinson, Quasha, & Robinson], 438

cardiotoxicity, in bupivacaine, in pregnant patient with mitral valve prolapse (correspondence) [Conklin & Ziadlou-Rad], 596

congenital defects, pediatric pulmonary artery catheters in, migration of (clinical report) [Moore, Mc Nicholas, Gallagher, & Niguidula], 102

**contractility**

and effects of enflurane on left ventricular function in intact and isolated canine heart [Zimpfer, Gilly, Krosi, Schlag, & Steinbereithner], 159

effects of halothane and enflurane on, during pentobarbital sodium anesthesia [Mote, Pruett, & Gramling], 53

coronary occlusion, during coronary ligation, effects of halothane, fentanyl, and no anesthesia on, compared [MacLeod, Augereau, & Walker], 44

digitalis, dysrhythmias following muscle relaxant administration in patients receiving (clinical report) [Bartolone & Rao], 567

dysrhythmias, following muscle relaxant administration in patients receiving digitalis (clinical report) [Bartolone & Rao], 567

ischemic damage to, following profound arterial hypotension [Dong, Bledsoe, Eng, Heavner, Shaw, Hornbein, & Anderson], 61

metabolism, during 24 hours deep pentobarbital anesthesia [Gronert, Michenfelder, Steen, & Milde], 18

mitral valve, prolapse, in pregnant patient, bupivacaine cardiotoxicity in (correspondence) [Conklin & Ziadlou-Rad], 596

mitral valve disease, intravenous verapamil to relieve pulmonary congestion in (clinical report) [Kopman], 374

**myocardial function**

effects of halothane and enflurane on, during pentobarbital sodium anesthesia [Mote, Pruett, & Gramling], 53

importance of, in determining effects of enflurane on left ventricular function [Zimpfer, Gilly, Krosi, Schlag, & Steinbereithner], 159

oxygen consumption, during 24 hours deep pentobarbital anesthesia [Gronert, Michenfelder, Steen, & Milde], 18

pacemakers, artificial, malfunction associated with positive-pressure ventilation (clinical report) [Thiagarajah, Azar, Agres, & Lear], 565

pulse, rate, and anesthetic potency for enflurane (correspondence) [Kissin & Morgan], 109

rate, response to nociceptive stimulation as index of anesthetic potency for enflurane (correspondence) [Kissin & Morgan], 109

sinoatrial node, effects of halothane, enflurane, and isoflurane on [Bosnjak & Kampine], 314

tachycardia, termination of, intravenous verapamil in, in mitral valve disease (clinical report) [Kopman], 374

vascular pressure, vecuronium and pancuronium influence on, in patients undergoing coronary artery bypass grafting [Morris, Cahalan, Miller, Wilkinson, Quasha, & Robinson], 438

**ventricles**

in Eisenmenger's syndrome, pulmonary artery catheters and (correspondence) [Noble, Devitt, & Byrick], 589

in Eisenmenger's syndrome, pulmonary artery catheters and (correspondence) [Robinson], 588

ventricular work, gram-meter and (correspondence) [Frank], 297

Wolff-Parkinson-White syndrome, fentanyl and droperidol effects on refractoriness of accessory pathway in [Gómez-Arnau, Márquez-Montes, & Avello], 307

**Heart rate, see under Heart**

**Heat, noxious, see under Pain**

**Hemodilution, see under Blood**

**Hemorrhage**

estimating allowable blood loss in: corrected for dilution (clinical report) [Gross], 277

massive occult retroperitoneal, during hip surgery (clinical report) [Brizgys & Hicks], 473

**Hepatic, see under Liver**

**Hepatotoxicity, see under Liver**

**Histamine**

release, study of changes in, with BW A444U-induced block [Savarese, Ali, Basta, Sunder, Moss, Gionfriddo, Lineberry, Wastila, El-Sayad, Montague, & Braswell], 333

**History**

embolism, air (editorial view) [Albin], 113

of gram-meter (correspondence) [Frank], 297

Japanese pioneer in clinical use of intrathecal morphine (correspondence) [Matsuki], 289

SI units (correspondence) [deJong], 296

**Hormones**

aldosterone, effect of PEEP ventilation on [Annat, Viale, Xuan, Aissa, Benzoni, Vincent, Gharib, & Motin], 136

- antidiuretic, effect of PEEP ventilation on [Annat, Viale, Xuan, Aissa, Benzoni, Vincent, Gharib, & Motin], 136
- growth deficiency, in suprasellar tumor, juvenile airway in adult with (clinical review) [Veselis & Korbon], 481
- prostaglandins, effect of PEEP ventilation on [Annat, Viale, Xuan, Aissa, Benzoni, Vincent, Gharib, & Motin], 136
- thyroid, pretreatment, isoflurane and enflurane-induced hepatic necrosis in [Berman, Kuhnert, Phythyon, & Holaday], 1
- vasopressin, plasma renin, and catecholamine, during nitroprusside-induced hypotension in ewes [Zubrow, Daniel, Stark, Husain, & James], 245
- Hydrothorax, see under Complications**
- Hyperpyrexia, see under Hyperthermia**
- Hypertension, see under Blood pressure; Complications; Lung(s)**
- Hyperthermia**
- malignant pyrexia**
- anesthetic management of child with asthma and presumed susceptibility to (clinical report) [Vaughn, Casson, & Hirshman], 283
- in Duchenne muscular dystrophy (clinical report) [Brownell, Paasuke, Elash, Fowlow, Seagram, Diewold, & Friesen], 180
- halothane-induced ATP depletion in platelets from patients susceptible to [Giger & Kaplan], 347
- prophylactic use of dantrolene for (correspondence) [Wingard], 489
- Hypnotics**
- barbiturates, pentobarbital, and triiodothyronine pretreatment, liver necrosis in [Berman, Kuhnert, Phythyon, & Holaday], 1
- Hypokalemic periodic paralysis, see under Complications**
- Hypotension, see under Anesthetic techniques; Blood pressure; Complications; Position; Shock**
- Hypothermia**
- see also under Anesthetic techniques; Temperature*
- and barbiturates, effects of, on cerebral oxygen consumption [Steen, Newberg, Milde, & Michenfelder], 527
- cardiopulmonary bypass with, pancuronium in [d'Hollander, Duvaldestin, Henzel, Nevelsteen, & Bomblet], 505
- deep body thermometry in, during general anesthesia (clinical report) [Muravchick], 271
- and electroencephalogram (correspondence) [Levy], 396
- and electroencephalogram (correspondence) [Sharbrough, Quasha, & Tinker], 396
- pancuronium retains potency at [Horrow & Bartkowski], 357
- Hypoxia**
- alveolar, intermittent, increases lobar hypoxic pulmonary vasoconstriction [Benumof], 399
- cluttered anesthesia machine as cause for (correspondence) [Hennling & Diaz], 288
- failure to use oxygen analyzers to prevent (correspondence) [Rendell-Baker & Meyer], 287
- hypoxic pulmonary vasoconstriction, lobar, intermittent hypoxia increases [Benumof], 399
- and pulmonary barotrauma, in accidental disconnection (correspondence) [Rendell-Baker & Meyer], 286
- pulmonary blood pressure and flow during, in dog [Glasser, Domino, Lindgren, Parcella, Marshall, & Marshall], 225

## I

**Immune response**

- acquired immunodeficiency disease (AIDS), and blood products (editorial view) [Miller & Bove], 493

**Infection**

- opportunistic, acquired immunodeficiency syndrome (AIDS) and blood products and (editorial view) [Miller & Bove], 493

**Influenza, see under Virus(es)****Interactions (drug)**

- see also* Antagonists, narcotic; Antagonists, neuromuscular relaxants; Pharmacology
- in succinylcholine infusion during isoflurane anesthesia [Donati & Bevan], 6

**Introducers, see under Equipment****Intubation**

- complications, in juvenile airway in adult with suprasellar tumor (clinical report) [Veselis & Korbon], 481

**endotracheal****complications**

- and influence of tube cuff design and lubrication on postoperative sore throat (clinical report) [Loeser, Kaminsky, Diaz, Stanley, & Pace], 376
- obstruction (correspondence) [Famewo], 593
- sharp edges causing (correspondence) [Skaredoff & Poppers], 595
- sharp edges causing (correspondence) [Weibel & Mathews], 595
- fiberoptic, for surgical corrections in flexion deformity of cervical spine (clinical report) [Ovassapian, Land, Schafer, Cerullo, & Zalkind], 370
- in juvenile airway in adult with suprasellar tumor (clinical report) [Veselis & Korbon], 481
- modification of Macintosh laryngoscope blade for (correspondence) [Ibler], 200
- and simple system for transtracheal ventilation (correspondence) [Gildar], 106

**technique**

- in acquired laryngeal deviation in erosive polyarticular arthritis [Keenan, Stiles, & Kaufman], 441
- guided, complication following (correspondence) [Adams], 105
- in patient with Hallervorden-Spatz disease (clinical report) [Roy, McLain, Wise, & Shaffner], 382
- for surgical corrections in flexion deformity of cervical spine (clinical report) [Ovassapian, Land, Schafer, Cerullo, & Zalkind], 370
- Ts of (correspondence), [Zmyslowski & Janfasa], 107

**nasotracheal**

- aid to (correspondence) [Berger & Stirt], 105
- guided, complication following (correspondence) [Adams], 105

**Ions****calcium**

- in DiGeorge syndrome anesthesia for surgery in (clinical report) [Flashburg, Dunbar, August, & Watson], 479
- and halothane sensitization of carotid sinus baroreceptors [Seagard, Hopp, Bosnjak, Elegbe, & Kampine], 432
- electrolyte imbalance, in ammonia toxicity from glycine absorption during urologic surgery (clinical report) [Roesch, Stoelting, Lingeman, Kahnoski, Backes, & Gephardt], 577
- potassium, and hypokalemic familial periodic paralysis (clinical report) [Melnick, Chang, Larson, & Bedger], 263
- sodium, imbalance of, in ammonia toxicity from glycine absorption during urologic surgery (clinical report) [Roesch, Stoelting, Lingeman, Kahnoski, Backes, & Gephardt], 577

**Isoflurane, see under Anesthetics, volatile**

## J

**Jehovah's Witnesses**, *see under Organizations*

**Jugular vein**, *see under Veins*

**J-wire**, *see under Equipment*

## K

**Kaposi's sarcoma**, *see under Cancer*

**Kawasaki disease**, *see under Complications*

**Ketamine**, *see under Anesthetics, intravenous*

## Kidney

blood flow, during 24 hours deep pentobarbital anesthesia [Gronert, Michenfelder, Steen, & Milde], 18

failure, prolonged effect of succinylcholine after neostigmine and pyridostigmine in (clinical report) [Bishop & Hornbein], 384

function, effect of PEEP ventilation on [Annat, Viale, Xuan, Aissa, Benzoni, Vincent, Gharib, & Motin], 136

metabolism, during 24 hours deep pentobarbital anesthesia [Gronert, Michenfelder, Steen, & Milde], 18

oxygen consumption, during 24 hours deep pentobarbital anesthesia [Gronert, Michenfelder, Steen, & Milde], 18

transplantation, prolonged effect of succinylcholine after neostigmine and pyridostigmine in (clinical report) [Bishop & Hornbein], 384

**Kinetics**, *see under Pharmacokinetics*

## L

**Laryngoscopes**, *see under Equipment; Intubation*

**Laryngoscopy**, *see under Anesthetic techniques; Larynx; Surgery*

## Larynx

### surgery of

beware of sharp edges of endotracheal tubes during (correspondence) [Skaredoff & Poppers], 595

beware of sharp edges of endotracheal tubes during (correspondence) [Weibel & Mathews], 595

**LD50**, *see under Potency, anesthetic*

**Lidocaine**, *see under Anesthetics, local; Heart, arrhythmias*

## Liver

blood flow, during 24 hours deep pentobarbital anesthesia [Gronert, Michenfelder, Steen, & Milde], 18

enzymatic activity, in ethanol-treated rats, enflurane, isoflurane, and methoxyflurane metabolism and [Van Dyke], 221

function, in ethanol-treated rats, enflurane, isoflurane, and methoxyflurane metabolism and [Van Dyke], 221

### hepatotoxicity

halothane, etiology of (correspondence) [Strunin, Harrison, & Davies], 391

isoflurane and enflurane-induced, in triiodothyronine pretreatment, 1 [Berman, Kuhnert, Phythyon, & Holaday], 1

ischemic damage to, following profound arterial hypotension [Dong, Bledsoe, Eng, Heavner, Shaw, Hornbein, & Anderson], 61

metabolism, during 24 hours deep pentobarbital anesthesia [Gronert, Michenfelder, Steen, & Milde], 18

oxygen, consumption, during 24 hours deep pentobarbital anesthesia [Gronert, Michenfelder, Steen, & Milde], 18

**Lumbar anesthesia**, *see under Anesthetic techniques, peridural; spinal*

## Lung(s)

asthma, and presumed susceptibility to malignant hyperthermia,

anesthetic management of child with (clinical report) [Vaughn, Casson, & Hirshman], 283

atelectasis, in dog, pulmonary blood pressure and flow during [Glasser, Domino, Lindgren, Parcella, Marshall, & Marshall], 225

### blood flow

in acute pulmonary embolism during therapeutic arterial embolization (clinical report) [Capan, Lardizabal, Sinha, Ashok, Berenstein, & Turndorf], 569

as dependent upon initial state of vasculature (correspondence) [Bagshaw & Cox], 205

and blood pressure during atelectasis in dog [Glasser, Domino, Lindgren, Parcella, Marshall, & Marshall], 225

in intermittent hypoxia [Benumof], 399

and mixed venous O<sub>2</sub> tension, effects of, on gas exchange [Bishop & Cheney], 130

in nitroglycerin and nitroprusside in pulmonary hypertension [Pearl, Rosenthal, & Ashton], 514

bronchus, local anesthetics as bronchodilator aerosols and [Downes, Hirshman, & Leon], 216

### compliance

in alternating lung ventilation in dogs [Muneyuki, Konishi, Horiguchi, Tsujimoto, Saito, Sakakura, & Konishi], 353

in response to local anesthetics as bronchodilator aerosols [Downes, Hirshman, & Leon], 216

edema, and effects of pulmonary blood flow and mixed venous O<sub>2</sub> tension on gas exchange [Bishop & Cheney], 130

### Eisenmenger's syndrome

pulmonary artery catheters in (correspondence) [Noble, Devitt, & Byrick], 589

pulmonary artery catheters in (correspondence) [Robinson], 588

hypertension, misdiagnosis of, in migration of pediatric pulmonary artery catheters (clinical report) [Moore, Mc Nicholas, Gallagher, & Niguidula], 102

intravascular pressures, in alternating lung ventilation in dogs [Muneyuki, Konishi, Horiguchi, Tsujimoto, Saito, Sakakura, & Konishi], 353

lymph flow, and pure oxygen breathing [Erdmann, Huttemeier, Landolt, & Zapol], 153

macrophages, microbicidal activity of, halothane inhibits (laboratory report) [Welch], 456

obstructive pulmonary disease, chronic, ventilation after thiopental and midazolam in [Cross, Zebrowski, Carel, Gardner, & Smith], 540

pneumonia, induced by diethyl ether, halothane, enflurane, and pentobarbital anesthesia in mice [Knight, Bedows, Nahrwold, Maassab, Smitka, & Busch], 209

### pulmonary artery

diastolic-pulmonary artery occluded pressure gradient, resistance versus (correspondence) [Hilgenberg], 484

diastolic-pulmonary artery occluded pressure gradient, resistance versus (correspondence) [Schulte-Sasse, Hess, & Tarnow], 486

initial state of, pulmonary vascular response is dependent upon (correspondence) [Bagshaw & Cox], 205

response, intermittent hypoxia increases [Benumof], 399

respiratory distress syndrome, pulmonary blood flow and mixed venous O<sub>2</sub> tension studies in [Bishop & Cheney], 130

respiratory resistance, in response to local anesthetics as bronchodilator aerosols [Downes, Hirshman, & Leon], 216

trachea, and simple system for transtracheal ventilation (correspondence) [Gildar], 106

vascular permeability, pure oxygen breathing increases [Erdmann, Huttemeier, Landolt, & Zapol], 153

#### **vascular resistance**

altered, in migration of pediatric pulmonary artery catheters (clinical report) [Moore, Mc Nicholas, Gallagher, & Niguidula], 102

is dependent upon initial state of vasculature (correspondence) [Bagshaw & Cox], 205

intermittent hypoxia increases [Benumof], 399

pulmonary artery diastolic-pulmonary artery occluded pressure gradient versus (correspondence) [Hilgenberg], 484

pulmonary artery diastolic-pulmonary artery occluded pressure gradient versus (correspondence) [Schulte-Sasse, Hess, & Tarnow], 485

**Lymph, see under Blood; individual organs**

## **M**

**Machines, anesthesia, see under Equipment**

**Macrophages, see under Lung(s)**

**Malignant pyrexia, see under Hyperthermia**

**Masks, anesthesia, see under Equipment**

**Mathematics, see under Measurement techniques**

#### **Measurement techniques**

chromatography, high-pressure liquid, in study of halothane-induced ATP depletion in platelets from patients susceptible to malignant hyperthermia [Giger & Kaplan], 347

computer, hand-held, for assuring proper drug dosage (correspondence) [Goyette], 202

finger, for measurement of catheter length (correspondence) [Horow], 198

gas exchange, lung model for testing (correspondence) [Stenqvist & Sonander], 594

mathematics, use of negative exponents in (editorial view) [Michenfelder], 305

#### **neuromuscular blockade**

long-term succinylcholine, during isoflurane anesthesia [Donati & Bevan], 6

succinylcholine in, potentiation with isoflurane [Donati & Bevan], 552

pulmonary vascular resistance (correspondence) [Hilgenberg], 484

pulmonary vascular resistance (correspondence) [Schulte-Sasse, Hess, & Tarnow], 485

regional, cerebral glucose utilization (correspondence) [Crosby & Sokoloff], 291

regional, cerebral glucose utilization (correspondence) [Hawkins, Hass, & Ransohoff], 290

SI units (correspondence) [deJong], 296

thermometry, deep body, during general anesthesia (clinical report) [Muravchick], 271

venous pressure, for open heart surgery (correspondence) [Marquez, Sassano, Winter, & Waterman], 394

#### **Membrane cell**

SA node, effects of halothane, enflurane, and isoflurane on, [Bosnjak & Kampine], 314

#### **Metabolism**

adenosine triphosphate, halothane-induced depletion of, in platelets from patients susceptible to malignant hyperthermia [Giger & Kaplan], 347

#### **metabolites**

of enflurane, isoflurane, and methoxyflurane in rat hepatic microsomes from ethanol-treated animals [Van Dyke], 221

by rat hepatic microsomes, following ethanol consumption [Rice, Dooley, & Mazze], 237

oxygen consumption, during 24 hours deep pentobarbital anesthesia [Gronert, Michenfelder, Steen, & Milde], 18

respiratory quotient, measurements, lung model for testing (correspondence) [Stenqvist & Sonander], 594

#### **sodium citrate**

neutralizing capacity of (correspondence) [Eyler & Zaccari], 591

neutralizing capacity of (correspondence) [Gibbs & Banner], 592

thiopental, and protein binding [Burch & Stanski], 146

**Metabolites, see under Metabolism; Toxicity**

**Methoxyflurane, see under Anesthetics, volatile**

**Metocurine, see under Neuromuscular relaxants**

**Metrizamide, see under Pharmacology**

**Midazolam, see under Anesthetics, intravenous**

**Mitral valve disease, see under Heart**

**Mitral valve prolapse, see under Heart**

**Models, see under Membranes; Pharmacokinetics**

#### **Monitoring**

blood pressure, neonatal Dinamap® adaptation for (correspondence) [Zmyslowski & Lena], 583

central venous pressure, and right hydrothorax after left external jugular vein catheterization (clinical report) [Ghani & Berry], 93

Doppler, esophageal, for detection of air embolism [Martin & Colley], 117

#### **electroencephalogram**

hypothermia and (correspondence) [Levy], 396

hypothermia and (correspondence) [Sharbrough, Quasha, & Tinker], 396

electroencephalography, after metrizamide (correspondence) [Pyles & Pashayan], 590

evoked potentials, intraoperative (correspondence) [Raudzens], 593

intraoperative, of sensory-evoked potentials (medical intelligence) [Grundy], 72

neuromuscular blockade, with vecuronium in children [Fisher & Miller], 519

neuroradiology, anesthesia and (correspondence) [Pyles & Pashayan], 590

#### **oxygen**

and accidental disconnection, pulmonary barotrauma in (correspondence) [Rendell-Baker & Meyer], 286

failure in, in prevention of hypoxic accidents (correspondence) [Rendell-Baker & Meyer], 287

#### **pressure**

pulmonary artery, in Eisenmenger's syndrome (correspondence) [Noble, Devitt, & Byrick], 589

pulmonary artery, in Eisenmenger's syndrome (correspondence) [Robinson], 588

in prevention of patient abuse [Betts & Nicholson] (editorial view), 115

pulmonary artery, pressure, and detection of end-exhalation period by airway thermistor (clinical report) [Oden, Mitchell, & Benumof], 467

somatosensory-evoked potentials, during surgical correction of flex-

- ion deformity of cervical spine (clinical report) [Ovassapian, Land, Schafer, Cerullo, & Zalkind], 370
- stimulator, nerve, in study of train-of-four response in fast and slow muscles [Day, Blake, Standaert, & Dretchen], 414
- vascular pressures, continuous flush, hazard of, in infants (clinical report) [Murray & Todd], 187
- Morphine**, *see under Analgesics, narcotic; Anesthetic techniques; Anesthetics, narcotic*
- Moyamoya disease**, *see under Brain*
- Mucocutaneous lymph node syndrome**, *see under Complications*
- Muscle**
- gastrocnemius, train-of-four response in: effect of *d*-tubocurarine, pancuronium, and vecuronium [Day, Blake, Standaert, & Dretchen], 414
- skeletal
- blood flow, during 24 hours deep pentobarbital anesthesia [Gronert, Michenfelder, Steen, & Milde], 18
- contractility, in Hallervorden-Spatz disease, and anesthetic management (clinical report) [Roy, McLain, Wise, & Shaffner], 382
- Duchenne muscular dystrophy, malignant hyperthermia in (clinical report) [Brownell, Paasuke, Elash, Fowlow, Seagram, Diewold, & Friesen], 180
- dystonia, anesthetic management in (clinical report) [Roy, McLain, Wise, & Shaffner], 382
- Hallervorden-Spatz disease, anesthetic management in (clinical report) [Roy, McLain, Wise, & Shaffner], 382
- in hypokalemic familial periodic paralysis (clinical report) [Melnick, Chang, Larson, & Bedger], 263
- metabolism, during 24 hours deep pentobarbital anesthesia [Gronert, Michenfelder, Steen, & Milde], 18
- oxygen consumption, during 24 hours deep pentobarbital anesthesia [Gronert, Michenfelder, Steen, & Milde], 18
- soleus, train-of-four response in: effect of *d*-tubocurarine, pancuronium, and vecuronium [Day, Blake, Standaert, & Dretchen], 414
- Myalgia**, *see under Pain*
- Myocardium**, *see under Heart*

N

- Nasogastric tube**, *see under Equipment*
- Nasopharyngeal insufflation**, *see under Anesthetic techniques*
- Nasotracheal intubation**, *see under Intubation*
- Neck surgery**, *see under Surgery*
- Neostigmine**, *see under Antagonists, neuromuscular relaxants; Enzymes, cholinesterase*
- Nerve**
- accessory, permanent paralysis of, after cannulation of internal jugular vein (correspondence) [Zmyslowski & Lena], 583
- damage, paralysis, after cannulation of internal jugular vein (correspondence) [Hoffman], 583
- Neurolept anesthesia**, *see under Anesthetic techniques; Anesthetics, intravenous*
- Neuromuscular blockade**, *see under Measurement techniques*
- Neuromuscular relaxants**
- atracurium
- in surgical patients receiving balanced or isoflurane anesthesia [Sokoll, Gergis, Mehta, Ali, & Lineberry], 450

- systemic vascular responses to, during enflurane-nitrous-oxide anesthesia [Hilgenberg, Stoelting, & Harris], 242
- BW A444U, clinical pharmacology of [Savarese, Ali, Basta, Sunder, Moss, Gionfriddo, Lineberry, Wastila, El-Sayad, Montague, & Braswell], 333
- cardiovascular effects, evaluated in study of BW A444U [Savarese, Ali, Basta, Sunder, Moss, Gionfriddo, Lineberry, Wastila, El-Sayad, Montague, & Braswell], 333
- dantrolene**
- for child with asthma and presumed susceptibility to malignant hyperthermia (clinical report) [Vaughn, Casson, & Hirshman], 283
- prophylactic use of, for malignant hyperthermia (correspondence) [Wingard], 489
- gallamine, does not retain potency at hypothermia [Horrow & Bartkowski], 357
- metocurine**
- does not retain potency at hypothermia [Horrow & Bartkowski], 357
- effects of pretreatment with, on fentanyl-induced rigidity (clinical report) [Jaffe & Ramsey], 562
- pancuronium**
- dysrhythmias following administration of, in patients receiving digitalis (clinical report) [Bartolone & Rao], 567
- effect of, and train-of-four response in fast and slow muscles [Day, Blake, Standaert, & Dretchen], 414
- effects of pretreatment with, on fentanyl-induced rigidity (clinical report) [Jaffe & Ramsey], 562
- long-acting analogue of (correspondence) [Boros], 108
- retains potency at hypothermia [Horrow & Bartkowski], 357
- and succinylcholine, blockade with, recovery of neuromuscular function in perfused rat diaphragm after [Bartkowski], 409
- variations in, induced by cardiopulmonary bypass with hypothermia [d'Hollander, Duvaldestin, Henzel, Nevelsteen, & Bomblet], 505
- and vecuronium, cardiovascular effects of, in patients undergoing coronary artery bypass grafting [Morris, Cahalan, Miller, Wilkinson, Quasha, & Robinson], 438
- and vecuronium, pharmacokinetics and pharmacodynamics of, in anesthetized humans [Cronnelly, Fisher, Miller, Gencarelli, Nguyen-Gruenke, & Castagnoli], 405
- pipecurium, more information about (correspondence) [Boros], 108
- succinylcholine**
- dysrhythmias following administration of, in patients receiving digitalis (clinical report) [Bartolone & Rao], 567
- long-term infusion of, during isoflurane anesthesia [Donati & Bevan], 6
- and pancuronium, blockade with, recovery of neuromuscular function in perfused rat diaphragm after [Bartkowski], 409
- phase II block, potentiation of, with isoflurane [Donati & Bevan], 552
- prolonged effect of, after neostigmine and pyridostigmine in renal failure (clinical report) [Bishop & Hornbein], 384
- "self-taming" with, and muscle pain (correspondence) [Verma], 487
- d-tubocurarine**
- does not retain potency at hypothermia [Horrow & Bartkowski], 357

- effect of, and train-of-four response in fast and slow muscles [Day, Blake, Standaert, & Dretchen], 414
- Vecuronium**  
effect of, and train-of-four response in fast and slow muscles, [Day, Blake, Standaert, & Dretchen], 414  
neuromuscular effects of, in children [Fisher & Miller], 519  
and pancuronium, cardiovascular effects of, in patients undergoing coronary artery bypass grafting [Morris, Cahalan, Miller, Wilkinson, Quasha, & Robinson], 438  
and pancuronium, pharmacokinetics and pharmacodynamics of, in anesthetized humans [Cronnelly, Fisher, Miller, Gencarelli, Nguyen-Gruenke, & Castagnoli], 405
- Neurons, see under Brain; Spinal cord**
- Neuroradiology, see under Monitoring**
- Neurosurgery, see under Surgery**
- Neurosurgical anesthesia, see under Anesthesia**
- Nitrogen, see under Gases, nonanesthetic**
- Nitroglycerin, see under Anesthetic techniques, hypotension, induced**
- Nitroprusside, see under Anesthetic techniques, hypotension, induced; Pharmacology; Toxicity**
- Nutrition**  
**liquid**  
and intraoperative explosion during colon surgery (correspondence) [Freund & Radke], 196  
and intraoperative explosion during colon surgery (correspondence) [Rumley], 195
- Nitrous oxide, see under Anesthetics, gases**
- Nonbreathing circuits, see under Equipment, circuits**
- Norepinephrine, see under Sympathetic nervous system, catecholamines**
- O**
- Obstetric anesthesia, see under Anesthesia**
- Obstetric surgery, see under Surgery**
- Obstruction, see under Airway; Arteries; Gastrointestinal tract; Lung(s)**
- Obstructive pulmonary disease, see under Lung(s)**
- Ophthalmic surgery, see under Surgery**
- Opiate receptors, see under Receptors**
- ORG NC45, see under Neuromuscular relaxants**
- Organizations**  
Anesthetic Toxicity Symposium, at Gull Harbour (report of scientific meeting) [Brown], 208  
Jehovah's Witnesses, intraoperative autotransfusion in bilateral adrenalectomy for pheochromocytoma in (clinical report) [Smith, Mihm, & Mefford], 182  
Society of Cardiovascular Anesthesiologists, fourth annual meeting (report of scientific meeting) [Christian], 491
- Orthopedic surgery, see under Surgery**
- Outpatient anesthesia, see under Anesthesia**
- Overdose, see under Toxicity**
- Oxygen**  
alveolar, and hypoxia and lobar hypoxic pulmonary vasoconstriction [Benumof], 399  
blood levels, during atelectasis in dog [Glasser, Domino, Lindgren, Parcella, Marshall, & Marshall], 225  
consumption, lung model for testing (correspondence) [Stenqvist & Sonander], 594
- delivery system**  
faulty, due to design and lack of maintenance (correspondence) [McMahon, Holm, & Batra], 586  
faulty, due to design and lack of maintenance, manufacturer's comment on (correspondence) [Rosano], 587  
and method of mixing air and oxygen (correspondence) [DesMarteau & Byles], 490  
potentially fatal fault in (correspondence) [Julien], 584  
potentially fatal fault in, manufacturer's comment on (correspondence) [Luich], 585  
failure to use analyzers of, to prevent hypoxic accidents (correspondence) [Rendell-Baker & Meyer], 287  
pressure changes, in accidental disconnection, pulmonary barotrauma in (correspondence) [Rendell-Baker & Meyer], 286  
toxicity, and lung microvascular permeability [Erdmann, Huttemeier, Landolt, & Zapol], 153
- Oxygen analyzers, see under Equipment**
- P**
- Pacemakers, artificial, see under Equipment; Heart**
- Pain**  
**causalgia**  
treatment of (correspondence) [Szeinfeld & Pallares], 295  
treatment of (correspondence) [Teeple & Ghia], 294  
effects of lumbar epidural morphine on [Kafer, Brown, Scott, Findlay, Butz, Teeple, & Ghia], 418  
experimental, and effects of nitrous oxide, and transcutaneous electrical stimulation on brain potentials [Chapman, Schimek, Gehrig, Gerlach, & Colpitts], 250  
facial, induced by music (correspondence) [Yanagida], 388  
measurement, and effects of nitrous oxide, and transcutaneous electrical stimulation on brain potentials [Chapman, Schimek, Gehrig, Gerlach, & Colpitts], 250  
myalgia, "self-taming" with succinylcholine and (correspondence) [Verma], 487
- noxious heat**  
spinal fentanyl in suppression of [Suzukawa, Matsumoto, Collins, Kitahata, & Yuge], 510  
WDR dorsal horn neuronal activity and, spinally administered morphine in suppression of [Homma, Collins, Kitahata, Matsumoto & Kawahara], 232
- postoperative**  
cesarean section, epidural morphine in [Cohen & Woods], 500  
epidural morphine analgesia in [Nordberg, Hedner, Mellstrand, & Dahlstrom], 545  
stimulation, heart rate response to, as index of anesthetic potency for enflurane (correspondence) [Kissin & Morgan], 109  
venipuncture, predicting of (correspondence) [Burststein & Vanga], 487
- Pancuronium, see under Neuromuscular relaxants**
- Paralysis, see under Muscle, skeletal; Nerve, damage; Neuromuscular transmission**
- Parasympathetic nervous system**  
airway reactivity and (medical intelligence) [Hirshman], 170
- Pediatric anesthesia, see under Anesthesia**
- Pentobarbital, see under Anesthetics, intravenous; Hypnotics, barbiturates**
- Perfusion, see under Lung(s), blood flow; Ventilation**  
Petty, C., *Research Techniques in the Rat* (book review), 111



Petty, T. L., *Intensive and Rehabilitative Respiratory Care* (book review), 304

**Pharmacokinetics**

**distribution**

fentanyl, and postoperative rigidity following anesthesia with (clinical report) [Christian, Waller, & Moldenhauer], 275  
and protein binding in thiopental anesthesia [Burch & Stanski], 146

kinetics, and pharmacodynamics of vecuronium and pancuronium in anesthetized humans [Cronnelly, Fisher, Miller, Gencarelli, Nguyen-Gruenke, & Castagnoli], 405

lung model, for testing respiratory quotient measurements (correspondence) [Stenqvist & Sonander], 594

metabolism, and protein binding, in thiopental anesthesia [Burch & Stanski], 146

model, of vecuronium and pancuronium in anesthetized humans [Cronnelly, Fisher, Miller, Gencarelli, Nguyen-Gruenke, & Castagnoli], 405

**morphine**

and biphasic depression of ventilatory responses to CO<sub>2</sub> following [Kafer, Brown, Scott, Findlay, Butz, Teeple, & Ghia], 418  
epidural [Nordberg, Hedner, Mellstrand, & Dahlstrom], 545  
sodium thiosulfate, in humans, relation to sodium nitroprusside toxicity [Ivankovich, Braverman, Stephens, Shulman, & Heyman], 11

**Pharmacology**

drug dosage, simple means of assuring proper (correspondence) [Goyette], 202

**ethanol**

and enflurane, isoflurane, and methoxyflurane metabolism in hepatic microsomes of rats treated with [Van Dyke], 221  
and metabolism by rat hepatic microsomes of fluorinated ether anesthetics [Rice, Dooley & Mazze], 237

metrizamide, in neuroradiology, anesthesia and (correspondence) [Pyles & Pashayan], 590

nitroglycerin, in pulmonary hypertension in dogs, [Pearl, Rosenthal, & Ashton], 514

**nitroprusside**

and halothane sensitization of carotid sinus baroreceptors [Seagard, Hopp, Bosnjak, Elegbe, & Kampine], 432  
in pulmonary hypertension in dogs [Pearl, Rosenthal, & Ashton], 514

and sodium thiosulfate disposition in humans [Ivankovich, Braverman, Stephens, Shulman, & Heyman], 11

in study of cerebrovascular response to hypotension in hypertensive rats [Hoffman, Miletič, & Albrecht], 326

sodium citrate, reduced volume dose of, experience with (correspondence) [Stoops, Ravindran, & Viegas], 201

**Phenothiazines, see under Ataractics**

**Pheochromocytoma, see under Surgery**

**Physics**

and SI units (correspondence) [deJong], 296  
work, gram-meter and (correspondence) [Frank], 297

**Platelets, see under Blood**

**Pneumocephalus, tension, see under Brain; Complications**

**Pneumonia, see under Lung(s)**

**Polypeptides**

antagonists, and blood pressure control during anesthesia [Miller, Beckman, Woodside, Althaus, & Peach], 32

endorphins, and nitrous oxide interactions with opioid receptors (correspondence) [Gillman & Lichtigfeld], 483

**renin-angiotensin**

catecholamine, and vasopressin during nitroprusside-induced hypotension in ewes [Zubrow, Daniel, Stark, Husain, & James], 245

effect of PEEP ventilation on [Annat, Viale, Xuan, Aissa, Ben-zoni, Vincent, Gharib, & Motin], 136

importance of, in blood pressure control during anesthesia [Miller, Beckman, Woodside, Althaus, & Peach], 32

saralasin, and blood pressure control during anesthesia [Miller, Beckman, Woodside, Althaus, & Peach], 32

**Position**

intravenous fluid containers as aids for (correspondence) [Brown & Cadena], 301

lateral, and prone, compared in approach to lumbar epidural space (clinical report) [Mustafa, Milliken, & Bizzarri], 464

prone, advantage of, in approach to lumbar epidural space (clinical report) [Mustafa, Milliken, & Bizzarri], 464

**Positive end-expiratory pressure, see under Ventilation**

**Postoperative pain, see under Pain**

**Potency**

**anesthetic**

Cp<sub>ss</sub> (50), in use of vecuronium and pancuronium in anesthetized humans [Cronnelly, Fisher, Miller, Gencarelli, Nguyen-Gruenke, & Castagnoli], 405

dose-response, of isoflurane, halothane, and diethyl ether for various end points of anesthesia (laboratory report) [Kissin, Morgan, & Smith], 88

ED<sub>50</sub>, and age-dependent alterations in nitrous oxide requirement of mice [Koblin, Lurz, & Eger], 428

ED<sub>50</sub>, and safety margins for isoflurane and halothane, compared (laboratory report) [Kissin, Morgan, & Smith], 556

for enflurane, heart rate response to nociceptive stimulation as index of (correspondence) [Kissin & Morgan], 109

LD<sub>50</sub>, and safety margins for isoflurane and halothane, compared (laboratory report) [Kissin, Morgan, & Smith], 556

righting reflex, and age-dependent alterations in nitrous oxide requirement of mice [Koblin, Lurz, & Eger], 428

**Pregnancy**

mitral valve prolapse in, bupivacaine cardiotoxicity in (correspondence) [Conklin & Ziadlou-Rad], 596

neutralizing capacity of particulate antacids in (correspondence) [Eyder & Zaccari], 591

neutralizing capacity of particulate antacids in (correspondence) [Gibbs & Banner], 592

**Premedication**

in short-stay surgery, zomepirac and codeine compared as (clinical report) [Dunn, Morison, Fargas-Babjak, & Goldsmith], 265

**Pressure**

pulmonary vascular, measurement of, with detection of end-exhalation period by airway thermistor (clinical report) [Oden, Mitchell, & Benumof], 467

**Procaine, see under Anesthetics, local**

**Propranolol, see under Heart; Sympathetic nervous system, sympatholytic agents**

**Prostaglandins, see under Hormones**

**Protein**

binding, in thiopental anesthesia [Burch & Stanski], 146

Pseudocholinesterase, *see* under Biotransformation (drug); Enzymes  
 Publications, *see* under Education; Research  
 Pulmonary, *see* under Lung(s)  
 Pulmonary edema, *see* under Complications  
 Pulse, *see* under Heart  
 Pyrexia, *see* under Hyperthermia  
 Pyridostigmine, *see* under Antagonists, neuromuscular relaxants

## R

Rebreathing, *see* under Carbon dioxide  
 Receptors  
   baroreceptors, carotid sinus, extent and mechanism of halothane sensitization of [Seagard, Hopp, Bosnjak, Elegbe, & Kampine], 432  
   opiate, nitrous oxide interacts with (correspondence) [Gillman & Lichtigfeld], 483  
 Recovery  
   delerium, in nitrous oxide withdrawal syndrome, [Ruprecht, Dworacek, Ducardus, Schmitz, & Dzoljic], 524  
 Reflexes  
   baroreceptor, effects of halothane on [Seagard, Hopp, Bosnjak, Elegbe, & Kampine], 432  
   baroreponse  
     and cardiovascular depression by halothane in infants (correspondence) [Friesen], 387  
     and cardiovascular depression by halothane in infants (correspondence) [Ware, Robinson, & Gregory], 387  
 Regional anesthesia, *see* under Anesthetic techniques  
 Renin, *see* under Polypeptides, renin-angiotensin  
 Reports of scientific meetings, *see* under Organizations  
 Research  
   publications  
     anesthesiology, statistics should support (correspondence) [Stanley & Pace], 297  
     use of negative exponents in (editorial view) [Michenfelder], 305  
 Resistance, *see* under Airway  
 Respiratory distress syndrome, *see* under Lung(s)  
 Respiratory quotient, *see* under Metabolism  
 Respiratory resistance, *see* under Lung(s)  
 Resuscitation, *see* under Complications, cardiac arrest; Drowning; Heart, massage; Shock; Transfusion; Ventilation, artificial  
 Resuscitation bag, *see* under Equipment  
 Righting reflex, *see* under Potency, anesthetic  
 Rigidity, *see* under Complications

## S

Saralasin, *see* under Polypeptides  
 Scavengers, *see* under Equipment  
 Scientific meetings, reports of, *see* under Organizations  
 Seizures, *see* under Brain; Complications; Toxicity  
 Sevoflurane, *see* under Anesthetics, volatile  
 Shock  
   in massive occult hemorrhage during hip surgery (clinical report) [Lombard & Couper], 472  
 SI units, *see* under Measurement techniques  
 Silicone embolizing substance, *see* under Embolism  
 Sinoatrial node, *see* under Heart

Skeletal muscle, *see* under Muscle  
 Society of Cardiovascular Anesthesiologists, *see* under Organizations  
 Sodium, *see* under Acid-base equilibrium; Ions  
 Sodium citrate, *see* under Pharmacology  
 Soleus muscle, *see* under Muscle  
 Somatosensory-evoked potentials, *see* under Brain; Monitoring  
 Spinal anesthesia, *see* under Anesthetic techniques  
 Spinal cord  
   glucose utilization, with pentobarbital or nitrous oxide [Crosby, Crane, Jehle, & Sokoloff], 38  
   metabolism, regional, with pentobarbital or nitrous oxide [Crosby, Crane, Jehle, & Sokoloff], 38  
   somatosensory, evoked potentials (correspondence) [Raudzens], 593  
   stimulation, with pentobarbital or nitrous oxide [Crosby, Crane, Jehle, & Sokoloff], 38  
   uptake, in epinephrine as adjuvant to epidural morphine [Bromage, Camporesi, Durant, & Nielsen], 257  
   WDR neurons, suppression of noxiously evoked activity of, by spinally administered morphine [Homma, Collins, Kitahata, Matsumoto, & Kawahara], 232  
 Spinal surgery, *see* under Surgery  
 Statistics  
   absence of evidence is not evidence of absence (correspondence) [Hartung, Cottrell, & Giffin], 298  
   should support rather than strangle anesthesiology literature (correspondence) [Stanley & Pace], 297  
 Status epilepticus, *see* under Complications  
 Stethoscope, *see* under Equipment  
 Stevens, A. J. (ed.), *Preparation for Anaesthesia* (book review), 207  
 Stimulator, nerve, *see* under Equipment; Monitoring; Nerve; Neuromuscular junction  
 Stomach, *see* under Gastrointestinal tract; Vomiting  
 Stored blood, *see* under Transfusion  
 Subdural space, *see* under Brain  
 Subglottic stenosis, *see* under Airway  
 Succinylcholine, *see* under Neuromuscular relaxants  
 Support pads, *see* under Equipment  
 Surgery  
   arthroplasty, total hip, massive occult retroperitoneal hemorrhage during (clinical report) [Brizgys & Hicks], 473  
   cardiac  
     cardiopulmonary bypass, care of children following [Betts & Nicholson] (editorial review), 115  
     coronary artery bypass grafting, cardiovascular effects of vecuronium and pancuronium in patients undergoing [Morris, Cahalan, Miller, Wilkinson, Quasha, & Robinson], 438  
     deep body thermometry during general anesthesia (clinical report) [Muravchick], 271  
     in Kawasaki disease (clinical report) [McNiece & Krishna], 269  
     migration of pediatric pulmonary artery catheters following (clinical report) [Moore, Mc Nicholas, Gallagher, & Niguidula], 102  
   colonic  
     intraoperative explosion during, etiologic factors in (correspondence) [Freund & Radke], 196  
     intraoperative explosion during, etiologic factors in (correspondence) [Rumley], 195

- complications, and prospective evaluation of cardiac risk index (clinical report) [Jeffrey, Kunsman, Cullen, & Brewster], 462
- craniotomy, nitrous oxide and prevention of tension pneumocephalus after (correspondence) [Friedman], 196
- head, airway device for (correspondence) [Bedger, Chang, Larson, & Bleyaert], 199
- laryngoscopy, laser, anesthetic management and gas scavenging for, in infant subglottic stenosis (clinical report) [Rita, Seleny, & Holinger], 191
- larynx**
- beware of sharp edges of endotracheal tubes during (correspondence) [Skaredoff & Poppers], 595
  - beware of sharp edges of endotracheal tubes during (correspondence) [Weibel & Mathews], 595
- midtrimester abortions, disseminated intravascular coagulation following (clinical report) [White, Coe, Dworsky, & Margolis], 99
- neck, airway device for (correspondence) [Bedger, Chang, Larson, & Bleyaert], 199
- neurosurgery, in suprasellar tumor in juvenile airway in adult (clinical report) [Veselis & Korbon], 481
- obstetric, for midtrimester abortions, disseminated intravascular coagulation following (clinical report) [White, Coe, Dworsky, & Margolis], 99
- ophthalmic, airway device for (correspondence) [Bedger, Chang, Larson, & Bleyaert], 199
- orthopedic**
- fatal pulmonary embolism following (clinical report) [Pollard, Lovelock, & Jones], 373
  - for flexion deformity of cervical spine, anesthetic management for (clinical report) [Ovassapian, Land, Schafer, Cerullo, & Zalkind], 370
  - massive occult retroperitoneal hemorrhage during (clinical report) [Brizgys & Hicks], 473
- pheochromocytoma, bilateral adrenalectomy for, hypertension after intraoperative autotransfusion in (clinical report) [Smith, Mihm, & Mefford], 182
- risk factors, and prospective evaluation of cardiac risk index (clinical report) [Jeffrey, Kunsman, Cullen, & Brewster], 462
- spinal, somatosensory-evoked potential loss during (correspondence) [Raudzens], 593
- urologic**
- ammonia toxicity from glycine absorption during (clinical report) [Roesch, Stoelting, Lingeman, Kahnoski, Backes, & Gephardt], 577
  - visual disturbances during, glycine and blood-brain barrier and (correspondence) [Larson], 488
  - vascular, therapeutic arterial embolization during, acute pulmonary embolism in (clinical report) [Capan, Lardizabal, Sinha, Ashok, Berenstein, & Turndorf], 569
- Sympathetic block, see under Anesthetic techniques, regional**
- Sympathetic nervous system**
- airway reactivity and (medical intelligence) [Hirshman], 170
  - aminophylline, for child with asthma and presumed susceptibility to malignant hyperthermia (clinical report) [Vaughn, Casson, & Hirshman], 283
  - calcium channel blockers, to relieve pulmonary congestion in mitral valve disease (clinical report) [Kopman], 374
- catecholamines**
- epinephrine, arrhythmogenic plasma levels of, during halothane, enflurane, and pentobarbital anesthesia in dog [Sumikawa, Ishizaka, & Suzuki], 322
  - epinephrine, during halothane anesthesia for closure of cleft palate (clinical report) [Ueda, Hirakawa, & Mae], 574
  - epinephrine, -halothane interactions in children [Karl, Swedlow, Lee, & Downes], 142
  - epinephrine, influence of, as adjuvant to epidural morphine [Bromage, Camporesi, Durant, & Nielsen], 257
  - norepinephrine, arrhythmogenic plasma levels of, during halothane, enflurane, and pentobarbital anesthesia in dog [Sumikawa, Ishizaka, & Suzuki], 322
  - plasma renin, and vasopressin during nitroprusside-induced hypotension in ewes [Zubrow, Daniel, Stark, Husain, & James], 245
  - guanethidine, and renin, and blood pressure control during [Miller, Beckman, Woodside, Althaus, & Peach], 32
  - peripheral, and renin, and blood pressure control during [Miller, Beckman, Woodside, Althaus, & Peach], 32
  - sympatholytic agents, propranolol, pretreatment, in prophylaxis against ventricular arrhythmias (clinical report) [Hood & Mecca], 379
  - verapamil, intravenous, to relieve pulmonary congestion in mitral valve disease (clinical report) [Kopman], 374
- Sympatholytic agents, see under Sympathetic nervous system**
- Synaptosomes, see under Brain; Nerve**
- T**
- Tachycardia, see under Heart**
- Temperature**
- body, hypothermia in pregnancy (clinical report) [Stånge & Halldin], 460
- hypothermia**
- and electroencephalogram (correspondence) [Levy], 396
  - and electroencephalogram (correspondence) [Sharbrough, Quasha, & Tinker], 396
  - pancuronium retains potency at [Horrow & Bartkowski], 357
- Tension pneumocephalus, see under Brain; Complications**
- Tetracaine, see under Anesthetics, local**
- Theories of anesthesia**
- and age-dependent alterations in nitrous oxide requirement of mice [Koblin, Lurz, & Eger], 428
- Thermometry, deep body, see under Measurement techniques**
- Thiopental, see under Anesthetics, intravenous; Anesthetics, rectal**
- Thiosulfate, see under Pharmacokinetics**
- Thromboembolism, see under Embolism**
- Thyroid, see under Hormones**
- Toxicity**
- cardiac, in etidocaine anesthesia in adult, newborn, and fetal sheep [Morishima, Pedersen, Finster, Feldman, & Covino], 342
  - convulsions, in etidocaine anesthesia in adult, newborn, and fetal sheep [Morishima, Pedersen, Finster, Feldman, & Covino], 342
  - cyanide, during sodium nitroprusside administration and surgery [Ivankovich, Braverman, Stephens, Shulman, & Heyman], 11

- hepatic**  
to halothane (correspondence) [Strunin, Harrison, & Davies], 391  
isoflurane and enflurane-induced, in triiodothyronine pretreatment [Berman, Kuhnert, Phythyon, & Holaday], 1  
metabolites, fluorinated ether anesthetics, following ethanol consumption [Rice, Dooley, & Mazze], 237  
nitroprusside, sodium thiosulfate disposition related to [Ivankovich, Braverman, Stephens, Shulman, & Heyman], 11  
overdose, chlorpromazine in child abuse (clinical report) [Ott, Pollock, Riddick, Reisch, & Epstein], 178
- Transfusion**  
autotransfusion, intraoperative, in bilateral adrenalectomy for pheochromocytoma, hypertension after (clinical report) [Smith, Mihm, & Mefford], 182  
blood, transmission of acquired immunodeficiency syndrome (editorial view) [Miller & Bove], 493  
crossmatch, for cesarean section (clinical report) [Reisner], 476  
**stored blood**  
for cesarean section (clinical report) [Reisner], 476  
and estimation of allowable blood loss (clinical report) [Gross], 277  
type and screen, for cesarean section (clinical report) [Reisner], 476
- Transtracheal ventilation, see under Ventilation**
- Trimethaphan, see under Blood pressure, hypotension; Sympathetic nervous system, ganglia**
- Tubes, see under Equipment**
- d-Tubocurarine, see under Neuromuscular relaxants**

## U

- Urologic surgery, see under Surgery**

## V

- Valves, see under Equipment**
- Varkey, G. P. (ed.), *International Anesthesiology Clinics: Anesthetic Considerations in the Surgical Repair of Intracranial Aneurysms* (book review), 398
- Vascular permeability, see under individual organs**
- Vascular pressures, see under Heart; Lung(s); Monitoring**
- Vascular resistance, see under Lung(s)**
- Vasopressin, see under Hormones**
- Vecuronium, see under Neuromuscular relaxants**
- Veins**  
**cannulation**  
permanent paralysis of accessory nerve after (correspondence) [Hoffman], 583  
prediction of painful (correspondence) [Burstein & Vanga], 487  
external jugular cannulation, complications, right hydrothorax as (clinical report) [Ghani & Berry], 93

- jugular, internal, cannulation of, permanent paralysis of accessory nerve after (correspondence) [Hoffman], 583  
venipuncture, predicting painful (correspondence) [Burstein & Vanga], 487

**Venipuncture, see under Veins****Ventilation**

- alternating lung, effects of, on cardiopulmonary functions in dogs [Muneyuki, Konishi, Horiguchi, Tsujimoto, Saito, Sakakura, & Konishi], 353  
artificial, resuscitation bag, need for, in operating room (correspondence) [Thys], 203
- carbon dioxide response**  
biphasic depression of, following epidural morphine [Kafer, Brown, Scott, Findlay, Butz, Teeple, & Ghia], 418  
and influence of epinephrine as adjuvant to epidural morphine [Bromage, Camporesi, Durant, & Nielsen], 257  
after thiopental and midazolam [Gross, Zebrowski, Carel, Gardner, & Smith], 540  
controlled, pacemaker malfunction associated with (clinical report) [Thiagarajah, Azar, Agres, & Lear], 565  
end-exhalation, detection of, by airway thermistor (clinical report) [Oden, Mitchell, & Benumof], 467  
perfusion, and mixed venous O<sub>2</sub> tension, effects of, on gas exchange [Bishop & Cheney], 130  
positive end-expiratory pressure, effect of, on renal function, plasma renin, aldosterone, neurophysins and urinary ADH, and prostaglandins [Annat, Viale, Xuan, Aissa, Benzoni, Vincent, Gharib, & Motin], 136  
transtracheal, simple system for (correspondence) [Gildar], 106

**Ventilators, see under Equipment****Ventricles, see under Heart****Verapamil, see under Sympathetic nervous system****Virus(es)**

- influenza, alterations in pulmonary pathology in, induced by diethyl ether, halothane, enflurane, and pentobarbital [Knight, Bedows, Nahrwold, Maassab, Smitka, & Busch], 209

## W

**WDR neurons, see under Spinal cord****Wolff-Parkinson-White syndrome, see under Heart**

- Wood, M., and Wood, A. J. J. (eds.), *Drugs and Anesthesia. Pharmacology for Anesthesiologists* (book review), 597

**Wrench holder, see under Equipment**

## Z

**Zomepirac, see under Analgesics, narcotic**
